## **Mutations on a novel brain-specific isoform of PGC1 $\alpha$ leads to extensive upregulation of neurotransmitter-related genes and sexually dimorphic motor deficits in mice**

Oswaldo A. Lozoya<sup>1</sup>, Fuhua Xu<sup>1</sup>, Dagoberto Grenet<sup>1</sup>, Tianyuan Wang<sup>2</sup>, Korey D. Stevanovic<sup>3</sup>, Jesse D. Cushman<sup>3</sup>, Patricia Jensen<sup>4</sup>, Bairon Hernandez<sup>5</sup>, Gonzalo Riadi<sup>5</sup>, Sheryl S. Moy<sup>6</sup>, Janine H. Santos<sup>1\*</sup> and Richard P. Woychik<sup>1\*</sup>

*<sup>1</sup>Genomic Integrity and Structural Biology Laboratory, <sup>2</sup>Integrative Bioinformatics Branch, <sup>3</sup>Neurobehavioral Core Laboratory, <sup>4</sup>Neurobiology Laboratory, National Institute of Environmental Health Sciences, National Institutes of Health, Research Triangle Park, North Carolina, USA; <sup>5</sup>Centro de Bioinformática y Simulación Molecular, Facultad de Ingeniería, Universidad de Talca, Chile; <sup>6</sup>Department of Psychiatry, Carolina Institute for Developmental Disabilities, University of North Carolina at Chapel Hill, Chapel Hill, North Carolina, USA*

*\*Co-corresponding authors:*

*Janine Hertzog Santos, Ph.D.*

*Email [janine.santos@nih.gov](mailto:janine.santos@nih.gov)*

*Richard P. Woychik, Ph.D.*

*Email [rick.woychik@nih.gov](mailto:rick.woychik@nih.gov)*

## Abstract

The peroxisome proliferator-activated receptor gamma co-activator 1 alpha (PGC1 $\alpha$ ) is known as a transcriptional co-activator in peripheral tissues but its function in the brain remains poorly understood. Various brain-specific *Pgc1 $\alpha$*  isoforms have been reported in mice and humans, including transcripts derived from a novel promoter about ~580 Kb upstream from the reference gene. These isoforms incorporate repetitive sequences from the simple sequence repeat (SSR) and short interspersed nuclear element (SINE) classes and are predicted to give rise to proteins with distinct amino-termini. In this study, we show that a SINE-containing isoform is the predominant form of *Pgc1 $\alpha$*  expressed in neurons. We then generated a mouse carrying a mutation within the SINE to study its functional role in the brain. By combining genomics, biochemical and behavioural approaches, we show that this mutation leads to impaired motor coordination in females, but not male mice, associated with the upregulation of hundreds of cerebellar genes. Moreover, our analysis suggests that known nuclear receptors interact with this isoform of PGC1 $\alpha$  in the brain to carry out the female transcriptional program. These data expand our knowledge on the role of *Pgc1 $\alpha$*  in the brain and help explain its conflicting roles in neurological disease and behavioural outcomes.

## 1 Introduction

2 There is increasing interest in the role of the peroxisome proliferator-activated receptor  
3 gamma co-activator 1 alpha (PGC1 $\alpha$ ) in the brain given mounting evidence that its levels are  
4 modulated in various neurodegenerative disorders including Huntington's (HD), Parkinson's  
5 (PD) and Alzheimer's disease (AD) as well as amyotrophic lateral sclerosis (ALS) ([Dumont et](#)  
6 [al., 2014](#); [Katsouri et al., 2012](#)). However, there is only limited information about the downstream  
7 targets of PGC1 $\alpha$  in the brain. Work done in skeletal muscle, liver, heart and brown adipose  
8 tissue (BAT) has shown that PGC1 $\alpha$  co-activates a series of genes prominently associated with  
9 mitochondria biogenesis, lipid metabolism, antioxidant defences and thermogenesis ([Lin et al.,](#)  
10 [2004](#)). However, conditional deletion of *Pgc1 $\alpha$*  in the central nervous system (CNS) shows only  
11 modest changes in these processes and causes the modulation of a different set of genes  
12 associated with brain function, such as synaptotagmin 2, complexin 1 and interneuron genes  
13 ([Lucas et al., 2012](#); [Lucas et al., 2010](#); [Lucas et al., 2014b](#)) ([Cui et al., 2006](#); [McMeekin et al.,](#)  
14 [2018](#)). Thus, it seems that the role and/or targets of PGC1 $\alpha$  in the brain differ from those of  
15 peripheral tissues.

16 In our previous work, we identified two mouse brain isoforms of *Pgc1 $\alpha$*  that initiated  
17 transcription from a promoter located ~570 Kb upstream from exon 2 ([Wang et al., 2016](#)). At this  
18 position, we found a simple sequence repeat (SSR) that encoded a transcript that spliced directly  
19 to the second common coding exon of *Pgc1 $\alpha$*  (SSR-exon2; Fig. 1A). We also identified another  
20 transcript where the SSR connected to a portion of a short interspersed nuclear element (SINE)  
21 located ~200 Kb downstream from it, which then spliced to exon 2 (SSR-SINE-exon2; Fig. 1A).  
22 We validated the expression of these isoforms in the brain by RT-PCR. We found that the SSR-  
23 SINE-exon2 *Pgc1 $\alpha$*  transcript was more abundant than the reference isoform in the ventral

24 tegmental area, amygdala, hippocampus and pre-frontal cortex using publicly available RNA-  
25 seq data. Also, we found that these transcripts were brain-specific, and that the SSR and the  
26 SINE were conserved in rodents, humans, non-human primates, dogs, chickens and  
27 sticklebacks ([Wang et al., 2016](#)). Given these findings, we conclude that the SSR and SINE  
28 exons we identified correspond to the previously described human B1 and B4 exons ([Soyal et  
29 al., 2012](#)) and that the SSR-SINE-exon2 and the B1-B4 are homologous isoforms in mice and  
30 humans.

31 Soyal and co-workers ([Soyal et al., 2012](#)) described multiple brain *Pgc1α* transcripts that  
32 originated from an alternative promoter (referred to as B1) located ~587 kb upstream of exon 2  
33 in humans. They showed that the expression levels of isoforms originating from B1 were similar  
34 or higher than that of the reference gene and were confined to specific cell types. For example,  
35 while astrocytes expressed the transcript originating from the reference promoter, neurons and  
36 oligodendrocytes transcribed primarily the isoform that initiated from B1 and that contained a  
37 novel exon B4 ([Soyal et al., 2012](#)). The B1-B4 containing isoform was found to be upregulated  
38 in the striatum, cortex and in the cerebellum of mice treated with 1-methyl-4-phenyl-1,2,3,6-  
39 tetrahydropyridine (MPTP), a drug commonly used to model PD ([Torok et al., 2017](#)). Conversely,  
40 in ALS mouse models the B1-B4 isoform seems downregulated ([Bayer et al., 2017](#)). More  
41 recently, the B1 promoter was shown to be activated by transcription factors, such as HIF1α,  
42 that do not act on the *Pgc1α* reference promoter ([Soyal et al., 2020](#)), demonstrating distinct  
43 transcriptional regulation of the brain isoforms. Finally, haplotypes encompassing the human  
44 region of the B1 promoter were associated with the age of onset of HD ([Soyal et al., 2012](#)) and  
45 with protection against PD ([Soyal et al., 2019](#)), collectively suggesting that sequence variations

46 in brain isoforms of *Pgc1α* may contribute to disease. Nevertheless, whether they are functional  
47 and regulate similar or distinct transcriptional targets remains unclear based on these studies.

48 In this study, we tested the hypothesis that the SINE-containing PGC1α isoform has its own  
49 set of targets that make its function distinct from that of the reference isoform in the brain. By  
50 generating a mouse carrying a mutation on the SINE that altered the predicted ORF of the SSR-  
51 SINE-exon2 transcript, here we demonstrate that this isoform is the primary transcript of *Pgc1α*  
52 expressed in neurons and that this intragenic mutation leads to impaired motor coordination  
53 prominently in females. More importantly, we find that this mutation results in the upregulation  
54 of hundreds of genes in the female but not male cerebellum, including many involved in  
55 neurotransmission. These findings suggest that the protein expressed from the SSR-SINE-  
56 exon2, with its distinct N-terminus, functions as a sex-specific transcriptional co-repressor in the  
57 brain.

## 58 **Results**

59 **Novel brain-specific *Pgc1α* isoforms are produced from a promoter in the SSR.** The  
60 ~600 Kb pre-mRNA of our previously identified brain isoforms of *Pgc1α* (Fig. 1A) are predicted  
61 to require between 3.3-10h to be transcribed, assuming an average transcription rate of 1-3  
62 Kb/min ([Wada et al., 2009](#)). While it is not unusual for brain transcripts to be exceedingly large  
63 ([Zylka et al., 2015](#)), the first step in our analysis was to confirm that the full length mRNAs existed  
64 *in vivo*. We used PacBio Technology, which generates sequencing reads of up to 60 Kb in length  
65 ([Rhoads and Au, 2015](#)), to determine the types of *Pgc1α* mRNA present in the whole mouse  
66 brain. Read lengths obtained under our experimental conditions ranged from 500 bp to >5.5 Kb  
67 (Table S1). We initially analysed reads >2Kb since they would encompass the entire mRNA of  
68 the predicted novel isoforms. We found evidence for transcription of the reference, SSR-exon2

69 and the SSR-SINE-exon2 isoforms, with the latter being the most abundant (Fig. 1B, Table S1).  
70 No reads containing sequences upstream from the SSR were identified. When all shorter reads  
71 were analysed (see Methods), we found additional evidence for the presence of the SINE-  
72 isoform as well as other non-canonical exon-exon pairs (for details see Table S1), suggesting  
73 that there may be additional as yet uncharacterized isoforms that could be analysed.

74 Having confirmed that full-length transcripts occurred *in vivo*, we next determined if the SSR  
75 locus contained the promoter. To this end, we mined publicly available chromatin  
76 immunoprecipitation sequencing (ChIP-seq) data for RNA polymerase II (RNA Pol II) and for the  
77 histone H3K9ac mark, both of which are known to be characteristically enriched at promoter  
78 regions. We found RNA Pol II peaks at the SSR locus in the brain (whole brain, cortex and  
79 cerebellum) but not in the liver, kidney or lung where peaks mapped to the reference *Pgc1a*  
80 promoter (Fig. 1C). The olfactory bulb also showed an RNA Pol II peak over the SSR (Fig. 1C).  
81 Likewise, ChIP-seq data from the hippocampus showed that H3K9ac peaks were prominent  
82 over the SSR locus in neurons but not in non-neuronal cells which were enriched for the  
83 repressive H3K27me3 mark (Fig. 1D). These results show that the SSR region enriches for  
84 marks normally associated with regulation of transcriptional initiation. It is noteworthy that the  
85 SSR genomic coordinates coincides with a CpG island, which is frequently found associated  
86 with promoters in mammals, together supporting the notion that it contains the promoter of the  
87 novel *Pgc1a* brain isoforms. The H3K9ac data also suggest that the promoter at the SSR locus  
88 is primarily responsible for transcription of *Pgc1a* in neurons.

89 The above data prompted us to define whether expression of the different *Pgc1a* transcripts  
90 is cell type-specific in the brain. To address this, we used RNA-seq derived from distinct brain  
91 cell types ([Zhang et al., 2014](#)) and compared the abundance of reads spanning the junctions

92 between the SSR-exon2, SINE-exon2 and exon1-exon2 to estimate the expression levels of the  
93 brain-specific transcripts with the reference *Pgc1α* isoform. Although several brain cell types  
94 were present in the dataset (Fig. 1E), only those with significant *Pgc1α* expression were  
95 considered for the analysis. We found that astrocytes expressed primarily the reference isoform  
96 since all reads from *Pgc1α* spanned the junctions between exons 1 and 2. Conversely, most  
97 reads covered the SINE-exon2 junction in neurons while in oligodendrocyte progenitor cells  
98 (OPCs) junction reads corresponding to the presence of all three isoforms were identified in  
99 similar proportions (Fig. 1E). Thus, distinct cell types express different isoforms of *Pgc1α* in the  
100 mouse brain. Most importantly, the SSR-SINE-exon2 transcript seems the primary transcript  
101 expressed in neurons.

102 **The SSR-SINE-exon2 isoform of Pgc1α is translated into protein.** The N-terminus of  
103 PGC1α is thought to dictate its transcriptional targets ([Martinez-Redondo et al., 2015](#); [Soyal et](#)  
104 [al., 2012](#)). Both the SSR-exon2 and SSR-SINE-exon2 isoforms skip exon 1 where the ATG used  
105 for translation initiation of the reference transcript of *Pgc1α* is present. Thus, these isoforms  
106 would need to use alternative ATGs if translated. In turn, they would give rise to proteins with  
107 different N-termini or reading frames. Analysis of the 5' sequences of the new *Pgc1α* mouse  
108 transcripts revealed an alternative ATG within the SSR (Fig. 1A), which could connect with the  
109 ORF in the downstream exons to give rise to a protein 810 amino acids-long with 29 novel  
110 residues at its N-terminus (Fig. 2A). We predict that this same ATG would be unlikely to initiate  
111 translation of the SINE-containing transcript given a stop codon within the SINE (Fig. 1A).  
112 Downstream from this stop codon, however, is an ATG that could connect the sequences within  
113 the SINE to the ORF in the downstream exons (Fig. 1A). In this case, the resulting protein would  
114 have 6 SINE-encoded amino acids that replace the 16 amino acids at the N-terminus of the

115 reference protein (Fig. 2A). To test whether the novel isoforms are translated into protein, we  
116 turned to publicly available ribosomal profiling data. Ribo-seq or ribosomal footprinting relies on  
117 deep sequencing of mRNA molecules after immunoprecipitation of ribosomes, giving a snapshot  
118 of the mRNAs that are actively translated within a cell ([Ingolia, 2014](#)). Thus, if these isoforms  
119 are translated into protein, the SSR and SINE, in addition to the exons of the reference protein,  
120 should be captured in the Ribo-seq dataset. We mined data derived from the hippocampus ([Cho  
121 et al., 2015](#)) and the liver ([Howard et al., 2013](#)), with the latter serving as negative control.  
122 Consistent with the repeat-containing isoforms being translated within the cell, large peaks were  
123 detected over the coordinates of the SSR, SINE and other exons from *Pgc1α* starting from exon  
124 2 in the hippocampus (Fig. 2B). Conversely, peaks covered only exon 1 of the reference form of  
125 the gene in the liver, with no peaks over the coordinates of either the SSR or SINE (Fig. 2B,  
126 compare red and blue lines). Thus, the novel brain isoforms derived from the SSR are translated  
127 in the brain but not in the liver, as we predicted. To further confirm these findings, we then  
128 developed antibodies against epitopes unique to the amino-terminus of the predicted proteins  
129 from the SSR-exon2 and the SSR-SINE-exon2, or from the C-terminus, which would be common  
130 to all isoforms of the protein. All antibodies were highly specific to the peptides they were  
131 developed against (Fig. S1A). However, those raised against the predicted amino-terminus of  
132 the SSR-exon2 or SSR-SINE-exon2 were unspecific in tissue lysates, likely because of their  
133 short epitopes. Antibodies for the C-terminus recognized a protein of the correct molecular  
134 weight of an engineered HA-tagged PGC1α recombinant protein that we generated and  
135 expressed in NIH3T3 cells (Fig. S1B and C).

136 **Mutation of the SINE in mice preserves normal brain anatomy but impairs behaviour**  
137 **and motor performance.** Soyal and co-workers ([Soyal et al., 2020](#)) recently demonstrated



138 crosstalk between the *Pgc1α* B1 and the reference promoter in the brain. Whereas they found  
139 that some stimuli activated both, which in turn seemed to co-activate each other, hypoxia was  
140 shown to engage the B1 but not the reference promoter. These results demonstrate fundamental  
141 differences in the regulation of these isoforms and suggest distinct contributions to brain  
142 physiology. However, to date there is no evidence that the new brain isoforms of *Pgc1α* are  
143 functional *in vivo*. While PGC1α KO mice that delete the common exon 3 were created ([Lin et](#)  
144 [al., 2004](#), [Leone et al., 2005](#), [Lucas et al., 2012, 2014](#)), these mutants eliminate all isoforms of  
145 *Pgc1α*, including the brain-specific transcripts that incorporate the SSR and SINE. Thus, to make  
146 a mouse model that could adequately establish the functional significance of the novel SSR-  
147 SINE-exon2 brain-specific isoform, we generated a mutant mouse targeting the SINE sequence.  
148 Using CRISPR/Cas9, we obtained several mutations that specifically targeted the SSR or SINE  
149 (unpublished results). We chose to establish a line of mutant mice with a 4-bp intragenic deletion  
150 immediately downstream of the putative ATG within the SINE (Fig. S2A). This mutation is  
151 predicted to abort translation of the SSR-SINE-exon2 transcript, generating a functional KO  
152 mouse. We confirmed that the transcript was still present in the brain of mutant animals and that  
153 no compensatory changes occurred in the expression of the reference isoform (Fig. S2B). Also,  
154 using the antibody generated against its C-terminus, we identified a protein in the brain of wild-  
155 type (WT) littermates but not in homozygous mutant animals with the same molecular weight as  
156 HA-tagged PGC1α (Fig. S2C). Thus, while the transcript from the 4-bp deletion mutant is present  
157 as predicted, no protein is detected in the brain of animals with this allele. We refer to these  
158 animals as SINE KO mutants.

159 Maintenance of this line revealed that homozygous mutant pups were born at the expected  
160 Mendelian ratio although an increase in the number of heterozygotes was noted in females (Fig.

161 3A). No postnatal lethality as reported with the exon 3 deletion mutants ([Lin et al., 2004](#)) was  
162 observed. Unlike for the exon 3 deletion allele, WT and SINE KO homozygotes showed no  
163 significant changes in body weight of males or females until later in life when males were ~10%  
164 leaner (Fig. 3B). As shown in figure 3C, cresyl violet staining of sagittal brain sections did not  
165 reveal any gross anatomical abnormalities associated with alleles of the exon 3 deletion mutation  
166 ([Lin et al., 2004](#)). Likewise, we did not detect the reported spongiform lesions in the striatum  
167 (Fig. 3D) nor did we observe reduced locomotion, muscle weakness or ataxia-associated signs  
168 as described previously for the exon 3 allele ([Lin et al., 2004](#)). Thus, our data suggest that  
169 elimination specifically of the form of PGC1 $\alpha$  expressed from the SSR-SINE-exon2 in neurons  
170 does not contribute to the post-natal lethality, neuropathology, muscle weakness and ataxia  
171 previously reported, which seem associated with the loss of the reference isoform in non-  
172 neuronal cell types. This conclusion is in line with a recent study that proposed that the  
173 neurological phenotypes are oligodendroglial in origin ([Szalardy et al., 2016b](#)).

174 Behavioural changes including hyperactivity and severe impaired motor coordination in the  
175 rotarod test were associated with the brain lesions found in the exon 3 deletion alleles ([Lucas et  
176 al., 2012](#)). However, more recent studies found less severe behavioural abnormalities in brain-  
177 specific conditional alleles of the exon 3 that were deemed to be unrelated to the neuropathology  
178 ([Szalardy et al., 2016a](#); [Szalardy et al., 2018](#)). The extent to which the SSR-SINE-exon2 isoform  
179 contributes to these phenotypes is unknown. To gain more insights into this issue, we started by  
180 subjecting SINE KO homozygotes and their WT littermates to the same rotarod assay applied  
181 by [Lucas et al., 2012](#), which involves two trials per day of increasing rotational speeds from 16-  
182 32 RPM. SINE mutants performed very poorly in this test (Fig. 3E), essentially phenocopying  
183 the defects previously described with the exon 3 deletion ([Lucas et al., 2012](#)). These results

184 suggest that loss of the SSR-SINE-exon2 *Pgc1 $\alpha$* , which is the primary isoform expressed in  
185 neurons, functionally contributes to decreased rotarod performance in a way that is unrelated to  
186 the presence of lesions in the brain. We then subjected an independent cohort of animals to a  
187 battery of behavioural tests, including a more conventional and less challenging rotarod (see  
188 below). Table 1 summarizes the timeline and overall test results obtained. While no statistical  
189 differences were found between WT and SINE KO homozygous mutant animals for most  
190 protocols (Fig. S3), a few sexual dimorphic outcomes were identified in the mutant animals. For  
191 example, male but not female SINE KO homozygotes had significant decreases in the  
192 magnitude of the startle response and impaired pre-pulse inhibition (Fig. 3F). Pre-pulse inhibition  
193 is disrupted in several neuropsychiatric disorders, including schizophrenia, which not only has a  
194 male preponderance but also has been associated with reduced cortical expression of PGC1 $\alpha$   
195 ([McMeekin et al., 2016](#)). Male SINE KO homozygotes also showed decreased arm entries in the  
196 elevated plus maze (Fig. 3G) and slightly slower initial swim speeds in the water maze (Fig. 3H),  
197 which may be indicative of increased anxiety and impaired swimming-related motor coordination,  
198 respectively. Interestingly, conflicting findings have been reported on anxiety-like behaviours for  
199 the full body exon 3 deletion alleles ([Leone et al., 2005](#); [Szalardy et al., 2018](#)). Finally, we found  
200 that female, but not male SINE KO homozygous mutants, had significantly higher target  
201 quadrant preferences relative to control animals in the Morris water maze (Fig. 3I), suggesting  
202 improved spatial learning and memory ([Vorhees and Williams, 2014](#)).

203 At 16-19 weeks in age, WT and SINE KO homozygous littermates were subjected to a  
204 standard accelerating rotarod protocol that differed from the test that we employed initially (Fig.  
205 3E). This protocol consisted of sessions over multiple days in which speed progressively  
206 increased from 3 to a maximum of 30 rpm across 5 min. The first test consisted of 3 trials of 5

207 min with 45 sec in between each (Fig. 3J, 1-3), which were followed by two additional trials that  
 208 occurred 48h later (Fig. 3J, 4-5). Females but not males showed significant impairments at trials  
 209 4-5 (Fig. 3J). At weeks 31-36 (trials 6-7) and 50-61 (trials 8-9), these animals were retested but  
 210 no differences between WT and mutant littermates were observed (trials 6-7 and 8-9, Fig. 3J).  
 211 These results show that the motor learning deficit in this less difficult assay was female-specific  
 212 and more subtle than in the previously reported protocol that we initially used ([Lucas et al., 2012](#)).  
 213 This argues that females may be more sensitive than males to the loss of the SSR-SINE-exon2  
 214 isoform. In addition, the absence of the motor deficit in the later tests (trials 6-7 and 8-9)  
 215 suggests that motor learning, and perhaps previous experience in other assays such as the  
 216 water maze (see Table 1 for timeline), allows them to overcome this deficit.

| Behavioral testing regimen |                                                                    |                                        |
|----------------------------|--------------------------------------------------------------------|----------------------------------------|
| Age (week)                 | Procedure                                                          | Outcome                                |
| 14-17                      | Elevated plus maze test for anxiety-like behavior                  | Males - Reduced overall entries        |
| 15-18                      | Locomotor activity and exploration in a 1-hour open field test     | No differences                         |
|                            | Wire-hang test for grip-strength                                   | No differences                         |
| 16-19                      | Accelerating rotarod test                                          | Female – impairments in trials 4 and 5 |
|                            | Trials 1-3 (first test); trials 4 and 5 (second test, 48 hr later) |                                        |
| 17-20                      | Social approach in a three-chamber choice task                     | No differences                         |
| 18-21                      | Marble-bury assay for anxiety and perseverative responses          | No differences                         |
|                            | Prepulse inhibition of acoustic startle responses                  | Males - Reduced startle and PPI        |
| 19-24                      | Buried food test for olfactory ability                             | No differences                         |
| 20-25                      | Morris water maze; visible platform test                           | Males - Reduced swim speed             |
| 21-27                      | Morris water maze; acquisition of spatial learning                 | Females – improved probe trial         |
| 23-28                      | Second acoustic startle test                                       | No differences                         |
|                            | Hot-plate test for thermal sensitivity                             | No differences                         |
| 26-31                      | Conditioned fear test for contextual and cue learning              | No differences                         |
| 28-33                      | Second fear test for memory retention                              | No differences                         |
| 31-36                      | Accelerating rotarod, trials 6 and 7                               | No differences                         |
| 32-37                      | Accelerating and fixed speed rotarod (1 min trials)                | No differences                         |
| 50-61                      | Accelerating rotarod, trials 8 and 9                               | No differences                         |
| 56-66                      | Rapid-reversal rotarod test (2 trials)                             | Males and females - impaired           |
| 58-67                      | Fixed speed rotarod (2 min trials)                                 | No differences                         |

217

218 To test the sex-dependence of the rotarod deficit and the potential role of motor learning in  
219 overcoming it, we took two different approaches. Firstly, we subjected these same animals to  
220 the more challenging rotarod test based on Lucas et al., 2012 (as in Fig. 3E). Consistent with  
221 the hypothesis that prior motor learning allowed them to overcome the deficits on this task, no  
222 impairments were identified (Fig. 3K). We then subjected them to a difficult protocol to which  
223 they had not been exposed, which involved rapid reversals in the direction of rotation of the  
224 rotarod. This revealed deficits in both males and female mutants (Fig. 3L). They were then re-  
225 tested on an easier rotarod version with fixed speeds and no differences were observed (see  
226 Table 1). Given that animals were tested at about the same ages in the latter three tests (Table  
227 1), the deficit in the rapid reversal task is likely to be driven by task difficulty and novelty rather  
228 than an age-related decline. Taken together, these data indicate that deficits in motor  
229 coordination and motor learning can be unmasked in the SINE KO mutants when animals are  
230 exposed to a novel and/or difficult protocol, that females are more affected and that training  
231 experience can overcome these deficits.

232 **SINE-mutant female mice exhibit increased neurotransmitter-associated gene**  
233 **expression in the cerebellum.** The phenotypes observed in the rotarod tests suggest a  
234 cerebellar but not a striatal-dependent deficit since the latter is more important for motor learning  
235 ([Dang et al., 2006](#)). Although prior studies reported cerebellar alterations in the exon 3 deletion  
236 mutant animals ([Lucas et al., 2014b](#)), the SINE KO mutants did not show obvious brain  
237 anatomical defects (Fig. 3C, D). To better understand the molecular underpinnings of the rotarod  
238 phenotype, we next profiled gene expression in dissected cerebella (Cb) of age-matched WT  
239 and SINE KO homozygous littermates, as well as the rest of the brain (Br, whole brain minus  
240 cerebellum) by microarray assays. We analysed differential expression based on RMA-

241 normalized probe intensities by the LSTNR method ([Lozoya et al., 2018](#)) ( $2^3$  full-factorial design,  
242  $N=2$  per group). Principal component analysis of 12,527 multivariate significant probe sets  
243 showed that the largest statistical differences between group means were observed in the  
244 cerebellum, most notably in females (Fig. 4A). Indeed, less than 50 probes were differentially  
245 enriched in the rest of the brain for each sex (Fig. 4B lower panels), whereas 2,016 probes in  
246 females or 354 probes in males were different between cerebellum of WT and SINE KO mutant  
247 littermates (Fig. 4B upper panels). Most probes showing significant expression differences in  
248 female cerebella were predominantly upregulated in the mutants (Fig. 4B, upper left panel). In  
249 males, the probes that were different between WT and mutant animals were mainly  
250 downregulated (Fig. 4B, upper right panel), which is consistent with what is known about loss of  
251 the reference PGC1 $\alpha$  isoform in peripheral tissues. These data point to sex differences  
252 associated with the loss of the protein derived from SSR-SINE-exon2 transcript and, most  
253 importantly, suggest that this isoform normally represses gene expression in the female brain.  
254 The degree of probe overlap between samples can be found in Fig. S4; the list of the 1,615  
255 genes encompassed by these probes can be found in Table S2.

256 We also submitted the differentially expressed genes to unsupervised hierarchical clustering  
257 to define patterns of expression. This approach revealed 4 different dominant patterns that were  
258 binned into clusters I through IV (Fig. 4C). Again, the largest differences in the degree of gene  
259 expression changes were observed in female cerebella, involving genes within clusters I and II  
260 that were all upregulated (257 and 677, respectively, Fig. 4C). These genes involved many  
261 processes specific to the brain, including receptors, transporters and biosynthetic enzymes of  
262 the neurotransmitters glutamate, dopamine, serotonin and cholinergic synapses (Table S2). The  
263 second largest changes occurred in genes binned into clusters III in males (156) and IV in

264 females (591), which were downregulated (Fig. 4C). These were involved in different cellular  
265 functions and included kinases, phospholipases, some transporters and channels in addition to  
266 immune-associated genes. It was noteworthy that no mitochondrial, antioxidant or other genes  
267 previously identified as differentially expressed in the cerebellum of animals with the conditional  
268 exon 3 deletion allele ([Lucas et al., 2014b](#)) were identified (Table S2). These may reflect the loss  
269 of all isoforms of *Pgc1* in the brain, supporting the notion that the proteins derived from the SSR-  
270 SINE-exon2 and from the reference *Pgc1* transcripts are not functionally equivalent in this tissue.

271 To more broadly understand the impact of loss of the protein expressed from the SSR-SINE-  
272 exon2 isoform, we used Ingenuity Pathway Analysis (IPA) to identify biological processes  
273 enriched based on the cerebellar gene expression profiles. Given the large difference in the  
274 number of genes and their sex-specific up or downregulation, we performed IPA separately in  
275 males and females. Several pathways relevant to brain physiology were enriched in females,  
276 while only reelin signalling was identified in males (Fig. 4D). However, it is interesting to note  
277 that the first *reeler* KO mouse described showed severe cerebellar abnormalities ([Caviness,  
278 1976](#)). Next, we used KEGG (Kyoto Encyclopedia of Genes and Genomes) to identify pathways  
279 enriched based on upregulated versus downregulated genes. Based on upregulated genes, we  
280 found over 50 significantly represented KEGG pathways, many of them relevant to brain-specific  
281 processes including the first top 7 (Table S3). Notably, the top category involved glutamatergic  
282 synapses, consistent with glutamate being one of the most abundant neurotransmitter in  
283 cerebellar cells ([Zampini et al., 2016](#)). Increased glutamate signalling was recently reported in  
284 the neocortex and hippocampus of another conditional brain-specific PGC1 $\alpha$  mutant that  
285 involved the deletion of the common exon 3 ([McMeekin et al., 2020](#)). In contrast, only 3 pathways



286 were significantly enriched based on downregulated genes, none of which were unique to brain  
287 physiology (Table S3).

288 The reference PGC1 $\alpha$  isoform is known for interacting with a set of nuclear receptors (NRs)  
289 to regulate downstream targets in peripheral tissues, including the estrogen receptor  $\alpha$  (ER $\alpha$ ).  
290 Given the sexual dimorphism identified in the gene expression profiles, we started by asking  
291 whether estrogen through the ER could be involved in this response. Using HOMER, a motif  
292 analysis algorithm, and a window of  $\pm 1$  Kb from the transcriptional start site (TSS) of genes, we  
293 found that about 18% of differentially expressed genes (DEGs) had an estrogen responsive  
294 element (ERE, Table S2). KEGG analysis of these 290 genes demonstrated that they enriched  
295 for 4 brain-specific pathways, although glutamatergic synapse was not among them (Table S4).  
296 To identify other potential proteins that could function as co-regulators of the gene expression  
297 with the protein expressed from the SSR-SINE-exon2 isoform, we used IPA to predict the  
298 upstream drivers of the transcriptional program. IPA derives its prediction from established  
299 interactions between transcription factors (TFs) and target genes based on published  
300 experimental evidence. Using exclusively the female gene expression, we identified many TFs  
301 that were previously associated with stress response or inflammatory signalling (Fig. 4E). It was  
302 noteworthy to find NRs known to interact with the reference PGC1 $\alpha$  such PPARG (peroxisome  
303 proliferator receptor gamma), NRF1 (nuclear respiratory factor 1), the RAR $\alpha$  (retinoic acid  
304 receptor alpha) and CREB1 (cyclic AMP responsive element binding protein 1) (Fig. 4E). These  
305 NRs were unexpected because their classic downstream targets were not present within our  
306 dataset. Nevertheless, it is possible that these NRs regulate target genes in the brain that differ  
307 from those in peripheral tissues. Consistent with this possibility, PPARG has been shown to



308 modulate NF- $\kappa$ B immune-dependent gene expression in microglia ([Bernardo and Minghetti,](#)  
309 [2006](#)), an effect that is not observed in the periphery.

310 To further explore the role of NRs specifically in the female cerebellum, we employed  
311 HOMER to identify the extent to which the identified DEGs harboured response elements (RE)  
312 that could be recognized by those NRs. We found that 20% of genes had a RE for NRF1, 13%  
313 for CREB1 and 2% for RAR $\alpha$  (Table S2), but when using these genes, no pathway enriched with  
314 a significant adjusted p-value (Table S4). About 56% of DEGs had a PPARG binding site (Table  
315 S2), 457 of which were not only upregulated but enriched for the same brain-specific pathways  
316 as the 884 upregulated genes; glutamatergic synapse was the top pathway (compare Tables S3  
317 and S4). Statistical analysis revealed that such a high enrichment for PPARG recognition  
318 sequence was not significantly different than the abundance of these sites in the other 13,509  
319 transcribed but not differentially expressed cerebellar genes (Table S2). Despite all of this, about  
320 100 genes that we identified as having a PPARG response element using HOMER are predicted  
321 to be downstream targets based on simulations on the PPAR database ([Fang et al., 2016](#)). It is  
322 also noteworthy that PPARG has been shown to drive sexual dimorphic phenotypes in the  
323 periphery and in the brain ([Duan et al., 2010](#); [Park and Choi, 2017](#)), including in models in which  
324 PPARG agonists were employed ([Benz et al., 2012](#)). Taken together, these data support the  
325 hypothesis that a component of the sexual dimorphic gene expression program identified in the  
326 SINE KO mutant cerebellum may be related to disruptions in the interaction between the SINE-  
327 containing protein and some of the same NRs that PGC1 $\alpha$  interacts with in peripheral tissues.

## 328 Discussion

329 Our understanding of the function of PGC1 $\alpha$  in the brain is still emerging. Despite findings  
330 describing multiple and uniquely regulated transcriptional PGC1 $\alpha$  isoforms in the brain ([Soyal et](#)

331 [al., 2020](#); [Soyal et al., 2012](#); [Soyal et al., 2019](#)), their function remain largely unknown. Full body  
332 and CNS-conditional *Pgc1α* KO mice were generated over a decade ago and found to have  
333 neurological phenotypes, including altered behaviour, but inconsistent data has been reported  
334 by different groups ([Dougherty et al., 2014](#); [Leone et al., 2005](#); [Lin et al., 2004](#); [Lucas et al.,](#)  
335 [2012](#); [Lucas et al., 2010](#); [Lucas et al., 2014b](#); [McMeekin et al., 2018](#)). Because those KO strains  
336 were generated by deletion of exon 3, which is common to all transcripts, it was impossible to  
337 dissect the potential contribution of the different isoforms to these phenotypes. In this study, by  
338 characterizing animals devoid solely of the novel SSR-SINE-exon2-encoded protein, we not only  
339 identified that this isoform inhibits genes but also that it drives a sex-dependent brain  
340 transcriptional program. These findings strongly suggest that the different brain *Pgc1α* isoforms  
341 are not functionally equivalent, which may further help explain conflicting reports about the  
342 benefits or detriment of modulating levels of the canonical PGC1α in the context of  
343 neurodegenerative disease ([Ciron et al., 2012](#); [Clark et al., 2012](#)). Most notably, our data  
344 suggests that the protein expressed from the SSR-SINE-exon2 isoform functions as a  
345 transcriptional repressor while the protein from the reference isoform functions as a  
346 transcriptional co-activator.

347 One of the best examples of the differential function of the *Pgc1α* brain isoforms stems from  
348 our findings that the SINE mutant mice did not show the gross neuroanatomical changes  
349 previously reported for the exon 3 deletion mutants. Yet, loss of this specific isoform resulted in  
350 significantly altered gene expression in the female cerebellum consisting primarily in the  
351 upregulation of genes, including those associated with neurotransmission. Furthermore, this in  
352 line with greater cerebellar dysfunction in the female SINE KO mice relative to males, as  
353 evidenced by notable motor coordination defects in the less difficult rotarod protocol ([Mason and](#)

354 [Sotelo, 1997](#)). This sexual dimorphic phenotype is reminiscent of the motor impairments  
355 reported in models of accelerated aging and PD ([Antzoulatos et al., 2010](#); [Baeta-Corral et al.,](#)  
356 [2018](#)). Nevertheless, the underlying cause for the sexual dimorphism observed herein remains  
357 unclear. Our analysis identified that 20% of the DEGs are potential targets of ER $\alpha$ ; PPARG may  
358 be involved in the regulation of another ~20-60% of them. Interestingly, 62% of the genes  
359 containing an ERE in our dataset also bear a PPARG recognition sequence (Table S2),  
360 suggesting that some ER $\alpha$  target genes may be regulated by PPARG. This is in line with  
361 previous reports demonstrating that PPARG can mediate the expression of estrogen target  
362 genes ([Keller et al., 1995](#); [Nunez et al., 1997](#)). Recent data demonstrated that PPARG is highly  
363 expressed in neurons in the adult mouse brain ([Warden et al., 2016](#)), but little is still known about  
364 its downstream targets in this cell type. In fact, the effects of PPARG on brain physiology, other  
365 than neuroinflammation, are poorly understood and have been mostly inferred using agonists  
366 such as pioglitazone, which has been shown to improve neurological deficits in different  
367 disorders, including rotarod performance in a mouse model of AD ([Toba et al., 2016](#)). Additional  
368 experiments are required to test the crosstalk between PPARG, the ER $\alpha$  or estrogen and the  
369 protein expressed from the SSR-SINE-exon2 isoform of *PGC1 $\alpha$*  in the brain.

370 The comprehensive upregulation of a cerebellar gene expression program by the loss of the  
371 protein expressed from the SSR-SINE-exon2 has not been reported previously using the exon  
372 3 deletion of *PGC1 $\alpha$* . It is possible that the upregulation of genes in the absence of *PGC1 $\alpha$*  in  
373 the brain was missed because most studies used RT-PCR to identify differential gene  
374 expression, which by its nature would limit the number and types of genes interrogated ([Lucas](#)  
375 [et al., 2012](#); [Lucas et al., 2010](#); [Lucas et al., 2014b](#); [McMeekin et al., 2020](#)). Also, the use of the  
376 exon 3 mutant, by virtue of ablating all isoforms of *PGC1 $\alpha$*  in the brain, may have masked this

377 phenotype. Alternatively, but not mutually exclusive, historical bias may have skewed previous  
378 results by emphasizing the analysis of repressed genes. Interestingly, two recent studies  
379 showed that the loss of PGC1 $\alpha$  in the brain led to the upregulation of genes, including in the  
380 striatum and in the hippocampus. In the striatum, upregulation of 429 genes was noted but only  
381 the 659 downregulated genes were further studied ([McMeekin et al., 2018](#)). Our re-analysis of  
382 the striatum data using different statistical criteria showed that over 1,000 were upregulated and  
383 they were enriched for some of the same brain-relevant pathways as identified by us;  
384 interestingly, about 50% of them had a PPAR $\gamma$  recognition element (Table S5). Thus, it seems  
385 that expression of the SSR-SINE-exon2 containing isoform of PGC1 $\alpha$  is tied to normally  
386 repressed gene expression profiles in the brain.

387       Glutamatergic synapse was the top category enriched by the upregulated genes (Table S3).  
388 A recent study using the exon 3 deletion mutant found ambulatory hyperactivity in response to  
389 a novel environment and enhanced glutamatergic transmission in the neocortex and  
390 hippocampus, along with reductions in mRNA levels from several PGC-1 $\alpha$  neuron-specific target  
391 genes. The authors concluded that PGC-1 $\alpha$  has a role in maintenance of gene expression  
392 programs for synchronous neurotransmitter release, structure, and metabolism in excitatory  
393 neurons ([McMeekin et al., 2020](#)). This would be consistent with our data in the cerebellum, in  
394 which granule cells are the most abundant glutamatergic neurons. It could also help explain the  
395 somewhat puzzling results that PGC1 $\alpha$  deletion in parvalbumin-expressing inhibitory  
396 interneurons using a conditional deletion of exon 3 does not produce motor deficits ([Lucas et al.,](#)  
397 [2014a](#)). Combined with our data, this suggests that the SSR-SINE-exon2 isoform may normally  
398 act to co-repress genes in excitatory neurons, in this case glutamatergic neurons, to support  
399 motor behaviour. Nevertheless, how this isoform of PGC1 $\alpha$  could repress, instead of co-activate,

400 gene transcription remains unknown. The protein expressed from the SSR-SINE-exon2 isoform  
401 adds 6 amino acids to the N-terminus of PGC1 $\alpha$  and replaces the 16 residues encoded by exon  
402 1. Prediction of secondary structure reveals that this small amino acid change alters the protein  
403 structurally in that two alpha helices are replaced by a single larger alpha helix at the N-terminus  
404 of the protein (Fig. S5). It is possible that these changes alter the ability of this isoform to dock  
405 into NRs in such a way that prevents the recruitment of histone acetyltransferases, which would  
406 effectively inhibit transcription. Alternatively, it could be that the altered N-terminus of the protein  
407 recruits a histone deacetylase, or functions to repress activation of (yet unidentified) TFs in  
408 neurons by sequestering their partners, similar to how it alters NF $\kappa$ B signalling (Fig. 4F). Finally,  
409 another possibility is the SSR-SINE-exon2 isoform activates a protein that is a transcriptional  
410 repressor for the genes we find upregulated. More work is clearly required to understand how  
411 this novel brain-specific isoform can ultimately lead to the co-repression of genes and the extent  
412 to which this leads to alternations in neurotransmission.

413 Lastly, HIF1 $\alpha$  was recently shown to activate transcription from the human B1 promoter,  
414 which corresponds to the SSR promoter in the mouse, by selectively interacting with it and not  
415 the reference promoter for the gene ([Soyal et al., 2020](#)). While the role of HIF1 $\alpha$  in the brain has  
416 previously been limited to hypoxic insult, a recent study has shown that crucial polarity-controlled  
417 events in neuronal determination and cerebellar germinal zone exit – including spindle  
418 orientation during neural stem cell division, axon-dendrite specification, or adhesive events that  
419 promote synaptogenesis ([Singh et al., 2016](#); [Singh and Solecki, 2015](#); [Uzquiano et al., 2018](#))  
420 are also regulated through HIF1 $\alpha$ -dependent pathways, and, consequently, are sensitive to O<sub>2</sub>  
421 tension ([Kullmann et al., 2020](#)). Whether brain-specific isoform of PGC1 $\alpha$  that we identified  
422 participates in such events by interacting with HIF1 $\alpha$  remains to be determined. As such, it will

423 also be interesting to study whether the protein expressed from the SSR-SINE-exon2 isoform  
424 plays a role in the physiological outcomes associated with brain ischemia, including those related  
425 to stroke and pre-term birth.

426 In summary, we established that the novel brain-specific SSRSINE-exon2 containing  
427 isoform of *Pgc1α* is functional *in vivo* and that it has roles in brain physiology that differ from the  
428 reference isoform of the gene. The extent to which it influences neurological disease, how it  
429 interplays with the other isoforms of PGC1α in the different cell types in the brain and whether  
430 its interaction with the ER or PPARG contributes to sexual dimorphic phenotypes that influence  
431 psychiatric disease constitute promising areas for future experimentation.

## 432 **Materials and Methods**

433 **SINE mutant animals.** C57B6/J mice were purchased from The Jackson Laboratories. A  
434 single CAS9 target site (AATTGGAGCCCCATGGATGAAGG) was utilized to disrupt the ORF of  
435 the SINE-*Pgc1α* (SINE-Ppargc1a) variant. Complementary oligos were ordered from IDTDNA  
436 (Coralville, IA, USA) and cloned into a T7 sgRNA plasmid, and *in vitro* transcribed using  
437 Epicentre AmpliScribe T7 High Yield Transcription Kit (Madison, WI, USA). C57BL/6J one-cell  
438 embryos were microinjected with CAS9 SgRNA (10 ng/ul each) and 5' capped/polyA tailed Cas9  
439 RNA (100 ng/ul) derived from pCAG-T3-hCAS-pA, a gift from Wataru Fujii & Kunihiko Naito ([Fujii  
440 et al., 2013](#)). Microinjected embryos were surgically transferred to SWISS pseudo-pregnant  
441 females. At weaning, potential founders were screened by PCR amplicon sequencing (FWD: 5'-  
442 TGAGAATATCAGTCTCTGGGGGA-3'; Rev 5'-CAGCCCCTCCTCTGAAATACAAA-3'). Based  
443 on computationally predicted CAS9 off-target sites, the nearest genetically linked off-target site  
444 was nearly 27 mb away and contained 4 mismatches to the CAS9 target sequence, and  
445 therefore was not screened in the founder mice. Founders of interest were bred to wildtype

446 C57BL/6 mice and F1 offspring were re-screened to confirm germline transmission. The mutant  
447 mouse line was crossed to wildtype C57BL/6J mice for at least two generations to eliminate any  
448 unknown, unlinked mutations. Phenotyping was done with founder line 4, which has a 4 bp  
449 deletion (TGAA) just 3' of the SINE variant translational start site corresponding to  
450 chr5:51,912,715-51,912,718 (GRCm38/mm10 assembly). Mouse colony genotyping was done  
451 by primer/probe assay by Transnetyx (FWD-Primer 5'-  
452 AGGTTTTTTGCGAAAATCAGTGA ACTAAT-3'; REV-Primer 5'-  
453 GCAGTTTGGAGCAATAGAGAAGAAC-3'; WT-PROBE 5'-AAAGTACCCTTCATCCATG-3';  
454 Mutant-PROBE 5'-ACTTACAAAGTACCCTCCATG-3'). All animal protocols were approved by  
455 the Animal Care and Use Committee (ACUC) at the National Institute of Environmental Health  
456 Sciences (NIEHS) and experiments conducted in accordance with relevant guidelines and  
457 regulations. Female and male mice were included in all experiments, which were performed on  
458 age-matched WT and SINE homozygous littermates.

459 **PacBio sequencing and data analysis.** We used RACE (Rapid Amplification of cDNA  
460 Ends) and whole brain RNA from the mouse to generate material for PacBio sequencing, which  
461 was performed at the National Institute Sequencing Core (NISC) in Bethesda. After sequencing,  
462 quality control was performed with FastQC (Available online at  
463 <https://www.bioinformatics.babraham.ac.uk/projects/fastqc/>). Primers and the first 50 bases  
464 with non-uniform nucleotide composition were removed with Trimmomatic ([Bolger et al., 2014](#)).  
465 A Phred quality filter was also applied, keeping sequences with quality over 10 ( $Q \geq 10$ ). To  
466 identify *Pgc1 $\alpha$*  transcript variants, we artificially generated template sequences containing all  
467 possible exon combinations (198) and aligned the PacBio reads to this reference sequence  
468 using Minimap2 tool ([Li, 2018](#)). Only alignments with map quality over 20 ( $MAPQ \geq 20$ ) that



469 aligned through the junction points of the template sequences (Exon-Exon, SINE-Exon and  
470 SSR-SINE-Exon) were kept. The alignments were visually inspected using IGV (Integrative  
471 Genomics Viewer) ([Thorvaldsdottir et al., 2013](#)).

472 **Antibody generation and specificity test.** Antibodies were generated by Covance against  
473 the following amino acids of PGC1 $\alpha$ : canonical isoform SQDSWSDIEC, epitope MDEGYF  
474 within the SINE and NYGSSWETPSNQC within the SSR and those at position 513-526 at the  
475 C-terminus of the protein. Serum was utilized for the experiments shown herein in a dilution of  
476 1-10. Specificity of antibodies was judged with purified peptides and in NIH3T3 cells expressing  
477 HA-tagged recombinant *Pgc1 $\alpha$* , which was cloned using forward  
478 5'TTGACTGGCGTCATTCGGGA3' and reverse 5'TCAGGAAGATCTGGGCAAAGAG3' primers  
479 and expressed through the pInducer20 lentiviral vector (Addgene). Western blots were  
480 performed using actin as loading control; secondary antibodies were obtained from LiCOR and  
481 membranes were visualized using a LiCOR Odyssey imager.

482 **Histological analysis.** Adult male and female SINE KO and WT littermate control mice  
483 were anesthetized with pentobarbital sodium and fixed via transcardial perfusion with 0.1M  
484 phosphate-buffered saline (PBS) followed by 4% paraformaldehyde (PFA) in PBS. Brains were  
485 removed, rinsed in PBS and fixed overnight in 4% PFA at 4°C. Brains were rinsed in PBS prior  
486 to cryoprotection in 30% sucrose in PBS. Cryoprotected brains were embedded in tissue-  
487 freezing medium (Triangle Biomedical Sciences) and sectioned. For each genotype and sex  
488 n=4 brains were sectioned at 25  $\mu$ m in the sagittal or coronal plane and collected on Superfrost  
489 Plus microscope slides (Thermo Scientific, Waltham, MA). One set of slides was processed for  
490 0.1% cresyl violet Nissl stain and a second with Luxol fast blue myelin stain. Following



491 dehydration and clearing, slides were coverslipped with Permount (SP15-500, ThermoFisher  
492 Scientific) mounting medium.

493 **Behavioural tests.** For the behavioural battery, animals generated at NIEHS were shipped  
494 to the UNC Mouse Behavioural Phenotyping Laboratory where 15 male and 11 female WT  
495 controls and 13 male and 6 female *Pgc1 $\alpha$*  SINE isoform knockout (KO) were tested. Mice were  
496 14 weeks in age at the start of behavioural testing. All animal care and procedures were  
497 conducted in strict compliance with the animal welfare policies set by the National Institutes of  
498 Health and by the University of North Carolina at Chapel Hill (UNC), and were approved by the  
499 UNC Institutional Animal Care and Use Committee.

500 **Social approach in a 3-chamber choice task.** Mice were evaluated for the effects of *Pgc1 $\alpha$*   
501 SSR-SINE isoform deficiency on social preference. The procedure consisted of 3 10-minute  
502 phases: a habituation period, a test for sociability, and a test for social novelty preference. For  
503 the sociability assay, mice were given a choice between proximity to an unfamiliar, sex-matched  
504 C57BL/6J adult mouse (“stranger 1”), versus being alone. In the social novelty phase, mice were  
505 given a choice between the already-investigated stranger 1, versus a new unfamiliar mouse  
506 (“stranger 2”). The social testing apparatus was a rectangular, 3-chambered box fabricated from  
507 clear Plexiglas. Dividing walls had doorways allowing access into each chamber. An automated  
508 image tracking system (Noldus Ethovision) provided measures of time in spent in each chamber  
509 and entries into each side of the social test box. At the start of the test, the mouse was placed  
510 in the middle chamber and allowed to explore for 10 minutes, with the doorways into the 2 side  
511 chambers open. After the habituation period, the test mouse was enclosed in the center  
512 compartment of the social test box, and stranger 1 was placed in one of the side chambers. The  
513 stranger mouse was enclosed in a small Plexiglas cage drilled with holes, which allowed nose

514 contact. An identical empty Plexiglas cage was placed in the opposite side of the chamber.  
515 Following placement of the stranger and the empty cage, the doors were re-opened, and the  
516 Behaviour in SSR-SINE KO mice 7 subject was allowed to explore the social test box for a 10-  
517 min session. At the end of the sociability phase, stranger 2 was placed in the empty Plexiglas  
518 container, and the test mouse was given an additional 10 min to explore the social test box.

519 **Morris water maze.** The water maze was used to assess spatial and reversal learning,  
520 swimming ability, and vision. The water maze consisted of a large circular pool (diameter = 122  
521 cm) partially filled with water (45 cm deep, 24-26° C), located in a room with numerous visual  
522 cues. The procedure involved two phases: a visible platform test and acquisition of spatial  
523 learning in the hidden platform task.

524 **Visible platform test.** Each mouse was given 4 trials per day, across 2 days, to swim to an  
525 escape platform cued by a patterned cylinder extending above the surface of the water. For each  
526 trial, the mouse was placed in the pool at 1 of 4 possible locations (randomly ordered), and then  
527 given 60 sec to find the visible platform. If the mouse found the platform, the trial ended, and the  
528 animal was allowed to remain 10 sec on the platform before the next trial began. If the platform  
529 was not found, the mouse was placed on the platform for 10 sec, and then given the next trial.  
530 Measures were taken of latency to find the platform and swimming speed via an automated  
531 tracking system (Ethovision 15, Noldus, Wageningen, NL).

532 **Acquisition of spatial learning in the water maze via hidden platform task.** Following  
533 the visible platform task, mice were tested for their ability to find a submerged, hidden escape  
534 platform (diameter = 12 cm). Each animal was given 4 trials per day, with 1 min per trial, to swim  
535 to the hidden platform. Criterion for learning was an average group latency of 15 sec or less to  
536 locate the platform, with a maximum of 9 days of training. Following testing on Day 9, mice were

537 given a 1-min probe trial in the pool with the platform removed. Selective quadrant search was  
538 evaluated by measuring the number of swim path crosses over the previous platform location,  
539 versus the corresponding location in the opposite quadrant.

540 **Fear conditioning.** Animals were held in an anteroom separated from the testing room to  
541 ensure that the animals did not hear testing of other animals for at least 30 min prior to  
542 training/testing. Training took place in four identical sound attenuating chambers (Context A; 28  
543 x 21x 21 cm; Med-Associates Inc.). The floor of each chamber consisted of a stainless-steel  
544 shock grid (1/2 inch apart) wired to a shock generator and scrambler (Med-Associates Inc.) to  
545 deliver foot shocks. Mice were evaluated for learning and memory in a conditioned fear test  
546 (Near-Infrared image tracking system, MED Associates, Burlington, VT). The procedure had the  
547 following phases: training on Day 1, a test for context-dependent learning on Day 2, and a test  
548 for cue-dependent learning on Day 3. Two weeks following the first tests, mice were given  
549 second tests for retention of contextual and cue learning. Training. On Day 1, each mouse was  
550 placed in the test chamber, contained in a sound-attenuating box, and allowed to explore for 2  
551 min. The mice were then exposed to a 30-sec tone (80 dB) that co-terminated with a 2-sec  
552 scrambled foot shock (0.4 mA). Mice received 2 additional shock-tone pairings, with 80 sec  
553 between each pairing.

554 **Context- and cue- dependent learning.** On Day 2, mice were placed back into the original  
555 conditioning chamber for a test of contextual learning. Levels of freezing (immobility) were  
556 determined across a 5-min session. On Day 3, mice were evaluated for associative learning to  
557 the auditory cue in another 5-min session. The conditioning chambers were modified using a  
558 Plexiglas insert to change the wall and floor surface, and a novel odour (dilute vanilla flavouring)  
559 was added to the sound-attenuating box. Mice were placed in the modified chamber and allowed

560 to explore. After 2 min, the acoustic stimulus (80 dB tone) was presented for a 3-min period.  
561 Levels of freezing before and during the stimulus were obtained by the image tracking system.  
562 Second test rounds were conducted 2 weeks after the first rounds.

563 **Accelerating rotarod, 5-min trials.** At 16-19 weeks in age, subjects were given 2 tests for  
564 motor coordination and learning on an accelerating rotarod (Ugo Basile, Stoelting Co., Wood  
565 Dale, IL). The first test consisted of 3 trials, with 45 sec between each trial. Two additional trials  
566 were given 48 hours later. Retests were conducted when mice were 31-36 weeks and 50-61  
567 weeks in age. Rpm (revolutions per minute) for each trial was set at an initial value of 3, with a  
568 progressive increase to a maximum of 30 rpm across 5 min (the maximum trial length).  
569 Measures were taken for latency to fall from the top of the rotating barrel.

570 **Rapid-reversal rotarod test, 5-min trials.** At 56-66 weeks in age, subjects were given a  
571 2-trial retest for motor coordination, using a rapid-reversal procedure. Rpm (revolutions per  
572 minute) for each trial was fixed at 10 rpm. Reversal of the direction of barrel spin occurred  
573 approximately every 15 s across the trial (maximum 5 min).

574 **Accelerating and Fixed speed Test on rotarod, 1 min trial.** At 4-6 months of age in our  
575 initial cohort and at 32-37 weeks of age in the behavioural test battery cohort, mice were  
576 evaluated in a rotarod procedure, modified from a previously described protocol ([Lucas et al.,](#)  
577 [2012](#)). Mice underwent 2 trials each at rotating speeds of 0-10 (accelerating), 16, 24, 28, and  
578 32 fixed rpm. Each trial was a maximum of 60 sec, with at least 5 min between each trial.

579 **Fixed speed test on the rotarod, 2-min trials.** At 58-67 weeks in age the behavioural test  
580 battery cohort, mice were evaluated in a final rotarod procedure, modified from a previously  
581 described protocol ([Lucas et al., 2012](#)). Mice underwent 2 trials each at rotating speeds of 24,  
582 28, and 32 fixed rpm. Each trial was a maximum of 120 sec, with at least 5 min between trials.

583       **Health status.** Deficiency of the *Pgc1α* SINE isoform did not lead to overt changes in health  
584 or general motor ability. No subjects were lost from the behaviour study by the time of the final  
585 rotarod test, conducted when mice were age ~60-70 weeks.

586       **Behavioural tests statistical analysis.** For each procedure, measures were taken by an  
587 observer blind to mouse genotype. Behavioural data were analysed using one-way or repeated  
588 measures Analysis of Variance (ANOVA), with separate analyses for males and females.  
589 Fisher's protected least-significant difference (PLSD) tests were used for comparing group  
590 means only when a significant F value was determined. For all comparisons, significance was  
591 set at  $p < 0.05$ . Data presented in figures and tables are means ( $\pm$  SEM).

592       **Sample processing and RNA extraction.** Mice were sacrificed and their brains  
593 immediately removed. While fresh, extracted brains were manually cleaned of brain stem tissue  
594 remnants by gross dissection, and split into cerebellum and rest of brain (whole brain minus  
595 cerebellum). Each specimen was then stored in an individual 15-ml conical tube, placed on dry-  
596 ice to snap-freeze and archived at  $-80^{\circ}\text{C}$ . To prevent cross-contamination and tissue degradation  
597 due to delayed processing, mice were dissected one at a time with a single-use scalpel blade  
598 each. RNA was extracted from the cerebellum or rest of the brain using TRIzol and 50-100 mg  
599 tissue per individual specimen; aqueous phase was retrieved to purify total RNA (ethanol  
600 precipitation, per manufacturer's guidelines). Aliquots with up to 1  $\mu\text{g}$  total RNA were treated  
601 with DNase I in solution (Invitrogen) before utilizing for RT-PCR or microarrays.

602       **Microarrays and data analysis.** The Affymetrix Human Genome U133 Plus 2.0  
603 GeneChip® arrays were used to profile gene expression. Samples were prepared as per  
604 manufacturer's instructions. Arrays were scanned in an Affymetrix Scanner 3000 and data was  
605 obtained using the GeneChip® Command Console and Expression Console Software (AGCC;

606 Version 3.2 and Expression Console; Version 1.2) using the MAS5 algorithm to generate CHP-  
607 extension files. Analysis of variance (ANOVA) was used to identify statistical differences  
608 between means of groups at  $\alpha < 0.05$  level among HG-U133 Plus 2.0 probe sets. Experiments  
609 followed a 2<sup>3</sup>-full factorial design with N=2 replication level, thus N=8 per group (WT or mutant)  
610 with 2 independent specimens each consisting of combinations across 3 variables (sex ×  
611 genotype × organ) with 2 levels each (M vs. F, WT vs. Mut, Cb vs. Rest-of-Br). All specimens  
612 were matched for litter set as much as possible (i.e. mouse origin's litters, parental breeding pair,  
613 or birth date). Ingenuity Pathway Analysis (IPA) was used to analyse differences between  
614 transcriptional profiles of SINE-mutant vs. WT littermates based on differential expression  
615 readouts with SNR>1 ( $|\log_2FC| > 0.286$ ) among the curated list of 1,980 single-gene differential  
616 probe sets (male cerebellum: 457; female cerebellum: 1,738; male rest-of-brain: 78; female rest-  
617 of-brain: 141).

618 **Data accessibility.** Genomics data for this publication have been deposited in the NCBI's  
619 Gene Expression Omnibus ([Barrett et al., 2011](#); [Barrett et al., 2013](#); [Edgar et al., 2002](#)) and are  
620 accessible through GEO Series accession number GSE152224.

## **Author Contributions**

FX generated and genotyped the initial animal cohort, performed the in-house rotarod assay, did the genomics analysis using publicly available data and qRT-PCR. OAL maintained the animal cohort, performed and analysed microarrays and qRT-PCR experiments. TW helped with bioinformatics. DG performed Western blots. BH and GR carried out transcript isoform reconstruction and analyses from long-range PacBio sequencing data. PJ performed histology and pathological assessment on dissected brains. SWS, KDS and JDC designed and performed behavioural studies. RPW and JHS conceptualized and oversaw the study, JHS was the lead writer of the manuscript.

## **Acknowledgments**

We thank the staff at the Core Facilities at NIEHS and NIH (Epigenetics and Genomics), Dr Artiom Gruzdev for generating the CRISPR/Cas9 KO animals and the critical comments on the manuscript by Drs. Paul Wade, G. Jean Harry and Kenneth Korach (NIEHS).

## **Funding**

This work was supported in part by the Intramural Research Program at the National Institute of Environmental Health Sciences of the National Institutes of Health (RPW), a doctoral scholarship from the Chilean National Agency for Research and Development (ANID, N°21201090) to BH and by Fondecyt grant 11140869 to GR (Chile).

## **Conflict of Interest**

The authors declare that the research was conducted in the absence of any commercial or financial relationships that could be construed as a potential conflict of interest.



## References

- Antzoulatos, E., M.W. Jakowec, G.M. Petzinger, and R.I. Wood. 2010. Sex differences in motor behavior in the MPTP mouse model of Parkinson's disease. *Pharmacol Biochem Behav.* 95:466-472.
- Baeta-Corral, R., R. Castro-Fuentes, and L. Gimenez-Llort. 2018. Sexual Dimorphism in the Behavioral Responses and the Immunoendocrine Status in d-Galactose-Induced Aging. *J Gerontol A Biol Sci Med Sci.* 73:1147-1157.
- Barrett, T., D.B. Troup, S.E. Wilhite, P. Ledoux, C. Evangelista, I.F. Kim, M. Tomashevsky, K.A. Marshall, K.H. Phillippy, P.M. Sherman, R.N. Muertter, M. Holko, O. Ayanbule, A. Yefanov, and A. Soboleva. 2011. NCBI GEO: archive for functional genomics data sets--10 years on. *Nucleic acids research.* 39:D1005-1010.
- Barrett, T., S.E. Wilhite, P. Ledoux, C. Evangelista, I.F. Kim, M. Tomashevsky, K.A. Marshall, K.H. Phillippy, P.M. Sherman, M. Holko, A. Yefanov, H. Lee, N. Zhang, C.L. Robertson, N. Serova, S. Davis, and A. Soboleva. 2013. NCBI GEO: archive for functional genomics data sets--update. *Nucleic acids research.* 41:D991-995.
- Bayer, H., K. Lang, E. Buck, J. Higelin, L. Barteczko, N. Pasquarelli, J. Sprissler, T. Lucas, K. Holzmann, M. Demestre, K.S. Lindenberg, K.M. Danzer, T. Boeckers, A.C. Ludolph, L. Dupuis, P. Weydt, and A. Witting. 2017. ALS-causing mutations differentially affect PGC-1alpha expression and function in the brain vs. peripheral tissues. *Neurobiology of disease.* 97:36-45.
- Benz, V., U. Kintscher, and A. Foryst-Ludwig. 2012. Sex-specific differences in Type 2 Diabetes Mellitus and dyslipidemia therapy: PPAR agonists. *Handb Exp Pharmacol:*387-410.
- Bernardo, A., and L. Minghetti. 2006. PPAR-gamma agonists as regulators of microglial activation and brain inflammation. *Curr Pharm Des.* 12:93-109.
- Bolger, A.M., M. Lohse, and B. Usadel. 2014. Trimmomatic: a flexible trimmer for Illumina sequence data. *Bioinformatics.* 30:2114-2120.
- Caviness, V.S., Jr. 1976. Patterns of cell and fiber distribution in the neocortex of the reeler mutant mouse. *J Comp Neurol.* 170:435-447.
- Cho, J., N.K. Yu, J.H. Choi, S.E. Sim, S.J. Kang, C. Kwak, S.W. Lee, J.I. Kim, D.I. Choi, V.N. Kim, and B.K. Kaang. 2015. Multiple repressive mechanisms in the hippocampus during memory formation. *Science.* 350:82-87.
- Ciron, C., S. Lengacher, J. Dusonchet, P. Aebischer, and B.L. Schneider. 2012. Sustained expression of PGC-1alpha in the rat nigrostriatal system selectively impairs dopaminergic function. *Hum Mol Genet.* 21:1861-1876.
- Clark, J., J.M. Silvaggi, T. Kiselak, K. Zheng, E.L. Clore, Y. Dai, C.E. Bass, and D.K. Simon. 2012. Pgc-1alpha overexpression downregulates Pitx3 and increases susceptibility to MPTP toxicity associated with decreased Bdnf. *PloS one.* 7:e48925.
- Cui, L., H. Jeong, F. Borovecki, C.N. Parkhurst, N. Tanese, and D. Krainc. 2006. Transcriptional repression of PGC-1alpha by mutant huntingtin leads to mitochondrial dysfunction and neurodegeneration. *Cell.* 127:59-69.
- Dang, M.T., F. Yokoi, H.H. Yin, D.M. Lovinger, Y. Wang, and Y. Li. 2006. Disrupted motor learning and long-term synaptic plasticity in mice lacking NMDAR1 in the striatum. *Proc Natl Acad Sci U S A.* 103:15254-15259.
- Dougherty, S.E., A.F. Bartley, E.K. Lucas, J.J. Hablitz, L.E. Dobrunz, and R.M. Cowell. 2014. Mice lacking the transcriptional coactivator PGC-1alpha exhibit alterations in inhibitory synaptic transmission in the motor cortex. *Neuroscience.* 271:137-148.



- Duan, S.Z., M.G. Usher, E.L.t. Foley, D.S. Milstone, F.C. Brosius, 3rd, and R.M. Mortensen. 2010. Sex dimorphic actions of rosiglitazone in generalised peroxisome proliferator-activated receptor-gamma (PPAR-gamma)-deficient mice. *Diabetologia*. 53:1493-1505.
- Dumont, M., C. Stack, C. Elipenahli, S. Jainuddin, N. Launay, M. Gerges, N. Starkova, A.A. Starkov, N.Y. Calingasan, D. Tampellini, A. Pujol, and M.F. Beal. 2014. PGC-1alpha overexpression exacerbates beta-amyloid and tau deposition in a transgenic mouse model of Alzheimer's disease. *FASEB journal : official publication of the Federation of American Societies for Experimental Biology*. 28:1745-1755.
- Edgar, R., M. Domrachev, and A.E. Lash. 2002. Gene Expression Omnibus: NCBI gene expression and hybridization array data repository. *Nucleic acids research*. 30:207-210.
- Fang, L., M. Zhang, Y. Li, Y. Liu, Q. Cui, and N. Wang. 2016. PPARgene: A Database of Experimentally Verified and Computationally Predicted PPAR Target Genes. *PPAR Res*. 2016:6042162.
- Fujii, W., K. Kawasaki, K. Sugiura, and K. Naito. 2013. Efficient generation of large-scale genome-modified mice using gRNA and CAS9 endonuclease. *Nucleic acids research*. 41:e187.
- Howard, M.T., B.A. Carlson, C.B. Anderson, and D.L. Hatfield. 2013. Translational redefinition of UGA codons is regulated by selenium availability. *The Journal of biological chemistry*. 288:19401-19413.
- Ingolia, N.T. 2014. Ribosome profiling: new views of translation, from single codons to genome scale. *Nature reviews. Genetics*. 15:205-213.
- Katsouri, L., K. Blondrath, and M. Sastre. 2012. Peroxisome proliferator-activated receptor-gamma cofactors in neurodegeneration. *IUBMB Life*. 64:958-964.
- Keller, H., F. Givel, M. Perroud, and W. Wahli. 1995. Signaling cross-talk between peroxisome proliferator-activated receptor/retinoid X receptor and estrogen receptor through estrogen response elements. *Mol Endocrinol*. 9:794-804.
- Kullmann, J.A., N. Trivedi, D. Howell, C. Laumonnerie, V. Nguyen, S.S. Banerjee, D.R. Stabley, A. Shirinifard, D.H. Rowitch, and D.J. Solecki. 2020. Oxygen Tension and the VHL-Hif1alpha Pathway Determine Onset of Neuronal Polarization and Cerebellar Germinal Zone Exit. *Neuron*. 106:607-623 e605.
- Leone, T.C., J.J. Lehman, B.N. Finck, P.J. Schaeffer, A.R. Wende, S. Boudina, M. Courtois, D.F. Wozniak, N. Sambandam, C. Bernal-Mizrachi, Z. Chen, J.O. Holloszy, D.M. Medeiros, R.E. Schmidt, J.E. Saffitz, E.D. Abel, C.F. Semenkovich, and D.P. Kelly. 2005. PGC-1alpha deficiency causes multi-system energy metabolic derangements: muscle dysfunction, abnormal weight control and hepatic steatosis. *PLoS Biol*. 3:e101.
- Li, H. 2018. Minimap2: pairwise alignment for nucleotide sequences. *Bioinformatics*. 34:3094-3100.
- Lin, J., P.H. Wu, P.T. Tarr, K.S. Lindenberg, J. St-Pierre, C.Y. Zhang, V.K. Mootha, S. Jager, C.R. Vianna, R.M. Reznick, L. Cui, M. Manieri, M.X. Donovan, Z. Wu, M.P. Cooper, M.C. Fan, L.M. Rohas, A.M. Zavacki, S. Cinti, G.I. Shulman, B.B. Lowell, D. Krainc, and B.M. Spiegelman. 2004. Defects in adaptive energy metabolism with CNS-linked hyperactivity in PGC-1alpha null mice. *Cell*. 119:121-135.
- Lozoya, O.A., J.H. Santos, and R.P. Woychik. 2018. A Leveraged Signal-to-Noise Ratio (LSTNR) Method to Extract Differentially Expressed Genes and Multivariate Patterns of Expression From Noisy and Low-Replication RNAseq Data. *Front Genet*. 9:176.

- Lucas, E.K., S.E. Dougherty, L.J. McMeekin, A.T. Trinh, C.S. Reid, and R.M. Cowell. 2012. Developmental alterations in motor coordination and medium spiny neuron markers in mice lacking *pgc-1alpha*. *PLoS one*. 7:e42878.
- Lucas, E.K., A. Jegarl, and R.L. Clem. 2014a. Mice lacking TrkB in parvalbumin-positive cells exhibit sexually dimorphic behavioral phenotypes. *Behav Brain Res*. 274:219-225.
- Lucas, E.K., S.J. Markwardt, S. Gupta, J.H. Meador-Woodruff, J.D. Lin, L. Overstreet-Wadiche, and R.M. Cowell. 2010. Parvalbumin deficiency and GABAergic dysfunction in mice lacking PGC-1alpha. *J Neurosci*. 30:7227-7235.
- Lucas, E.K., C.S. Reid, L.J. McMeekin, S.E. Dougherty, C.L. Floyd, and R.M. Cowell. 2014b. Cerebellar transcriptional alterations with Purkinje cell dysfunction and loss in mice lacking PGC-1alpha. *Front Cell Neurosci*. 8:441.
- Martinez-Redondo, V., A.T. Pettersson, and J.L. Ruas. 2015. The hitchhiker's guide to PGC-1alpha isoform structure and biological functions. *Diabetologia*. 58:1969-1977.
- Mason, C., and C. Sotelo. 1997. The cerebellum: A model for construction of a cortex - Preface. *Perspect Dev Neurobi*. 5:1-2.
- McMeekin, L.J., A.F. Bartley, A.S. Bohannon, E.W. Adlaf, T. van Groen, S.M. Boas, S.N. Fox, P.J. Detloff, D.K. Crossman, L.S. Overstreet-Wadiche, J.J. Hablitz, L.E. Dobrunz, and R.M. Cowell. 2020. A Role for PGC-1alpha in Transcription and Excitability of Neocortical and Hippocampal Excitatory Neurons. *Neuroscience*. 435:73-94.
- McMeekin, L.J., Y. Li, S.N. Fox, G.C. Rowe, D.K. Crossman, J.J. Day, Y. Li, P.J. Detloff, and R.M. Cowell. 2018. Cell-Specific Deletion of PGC-1alpha from Medium Spiny Neurons Causes Transcriptional Alterations and Age-Related Motor Impairment. *J Neurosci*. 38:3273-3286.
- McMeekin, L.J., E.K. Lucas, J.H. Meador-Woodruff, R.E. McCullumsmith, R.C. Hendrickson, K.L. Gamble, and R.M. Cowell. 2016. Cortical PGC-1alpha-Dependent Transcripts Are Reduced in Postmortem Tissue From Patients With Schizophrenia. *Schizophr Bull*. 42:1009-1017.
- Nunez, S.B., J.A. Medin, O. Braissant, L. Kemp, W. Wahli, K. Ozato, and J.H. Segars. 1997. Retinoid X receptor and peroxisome proliferator-activated receptor activate an estrogen responsive gene independent of the estrogen receptor. *Mol Cell Endocrinol*. 127:27-40.
- Park, H.J., and J.M. Choi. 2017. Sex-specific regulation of immune responses by PPARs. *Experimental & molecular medicine*. 49:e364.
- Rhoads, A., and K.F. Au. 2015. PacBio Sequencing and Its Applications. *Genomics Proteomics Bioinformatics*. 13:278-289.
- Singh, S., D. Howell, N. Trivedi, K. Kessler, T. Ong, P. Rosmaninho, A.A. Raposo, G. Robinson, M.F. Roussel, D.S. Castro, and D.J. Solecki. 2016. Zeb1 controls neuron differentiation and germinal zone exit by a mesenchymal-epithelial-like transition. *eLife*. 5.
- Singh, S., and D.J. Solecki. 2015. Polarity transitions during neurogenesis and germinal zone exit in the developing central nervous system. *Front Cell Neurosci*. 9:62.
- Soyal, S.M., P. Bonova, M. Kwik, G. Zara, S. Auer, C. Scharler, D. Strunk, C. Nofziger, M. Paulmichl, and W. Patsch. 2020. The Expression of CNS-Specific PPARGC1A Transcripts Is Regulated by Hypoxia and a Variable GT Repeat Polymorphism. *Mol Neurobiol*. 57:752-764.
- Soyal, S.M., T.K. Felder, S. Auer, P. Hahne, H. Oberkofler, A. Witting, M. Paulmichl, G.B. Landwehrmeyer, P. Weydt, W. Patsch, and N. European Huntington Disease. 2012. A greatly extended PPARGC1A genomic locus encodes several new brain-specific isoforms and influences Huntington disease age of onset. *Hum Mol Genet*. 21:3461-3473.

- Soyal, S.M., G. Zara, B. Ferger, T.K. Felder, M. Kwik, C. Nofziger, S. Dossena, C. Schwienbacher, A.A. Hicks, P.P. Pramstaller, M. Paulmichl, S. Weis, and W. Patsch. 2019. The PPARGC1A locus and CNS-specific PGC-1alpha isoforms are associated with Parkinson's Disease. *Neurobiology of disease*. 121:34-46.
- Szalardy, L., M. Molnar, R. Torok, D. Zadori, G.G. Kovacs, L. Vecsei, and P. Klivenyi. 2016a. Lack of age-related clinical progression in PGC-1alpha-deficient mice - implications for mitochondrial encephalopathies. *Behav Brain Res*. 313:272-281.
- Szalardy, L., M. Molnar, R. Torok, D. Zadori, L. Vecsei, P. Klivenyi, P. Liberski, and G.G. Kovacs. 2016b. Histopathological comparison of Kearns-Sayre syndrome and PGC-1alpha-deficient mice suggests a novel concept for vacuole formation in mitochondrial encephalopathy. *Folia Neuropathol*. 54:9-22.
- Szalardy, L., M.F. Molnar, D. Zadori, E.K. Cseh, G. Veres, G.G. Kovacs, L. Vecsei, and P. Klivenyi. 2018. Non-motor Behavioral Alterations of PGC-1alpha-Deficient Mice - A Peculiar Phenotype With Slight Male Preponderance and No Apparent Progression. *Front Behav Neurosci*. 12:180.
- Thorvaldsdottir, H., J.T. Robinson, and J.P. Mesirov. 2013. Integrative Genomics Viewer (IGV): high-performance genomics data visualization and exploration. *Brief Bioinform*. 14:178-192.
- Toba, J., M. Nikkuni, M. Ishizeki, A. Yoshii, N. Watamura, T. Inoue, and T. Ohshima. 2016. PPARgamma agonist pioglitazone improves cerebellar dysfunction at pre-Abeta deposition stage in APP<sup>swE</sup>/PS1<sup>dE9</sup> Alzheimer's disease model mice. *Biochem Biophys Res Commun*. 473:1039-1044.
- Torok, R., A. Salamon, E. Sumegi, D. Zadori, G. Veres, M.F. Molnar, L. Vecsei, and P. Klivenyi. 2017. Effect of MPTP on mRNA expression of PGC-1alpha in mouse brain. *Brain Res*. 1660:20-26.
- Uzquiano, A., I. Gladwyn-Ng, L. Nguyen, O. Reiner, M. Gotz, F. Matsuzaki, and F. Francis. 2018. Cortical progenitor biology: key features mediating proliferation versus differentiation. *Journal of neurochemistry*. 146:500-525.
- Vorhees, C.V., and M.T. Williams. 2014. Assessing spatial learning and memory in rodents. *ILAR J*. 55:310-332.
- Wada, Y., Y. Ohta, M. Xu, S. Tsutsumi, T. Minami, K. Inoue, D. Komura, J. Kitakami, N. Oshida, A. Papantonis, A. Izumi, M. Kobayashi, H. Meguro, Y. Kanki, I. Mimura, K. Yamamoto, C. Mataka, T. Hamakubo, K. Shirahige, H. Aburatani, H. Kimura, T. Kodama, P.R. Cook, and S. Ihara. 2009. A wave of nascent transcription on activated human genes. *Proc Natl Acad Sci U S A*. 106:18357-18361.
- Wang, T., J.H. Santos, J. Feng, D.C. Fargo, L. Shen, G. Riadi, E. Keeley, Z.S. Rosh, E.J. Nestler, and R.P. Woychik. 2016. A Novel Analytical Strategy to Identify Fusion Transcripts between Repetitive Elements and Protein Coding-Exons Using RNA-Seq. *PloS one*. 11:e0159028.
- Warden, A., J. Truitt, M. Merriman, O. Ponomareva, K. Jameson, L.B. Ferguson, R.D. Mayfield, and R.A. Harris. 2016. Localization of PPAR isotypes in the adult mouse and human brain. *Sci Rep*. 6:27618.
- Zampini, V., J.K. Liu, M.A. Diana, P.P. Maldonado, N. Brunel, and S. Dieudonne. 2016. Mechanisms and functional roles of glutamatergic synapse diversity in a cerebellar circuit. *eLife*. 5.
- Zhang, Y., K. Chen, S.A. Sloan, M.L. Bennett, A.R. Scholze, S. O'Keefe, H.P. Phatnani, P. Guarnieri, C. Caneda, N. Ruderisch, S. Deng, S.A. Liddelow, C. Zhang, R. Daneman, T. Maniatis, B.A. Barres, and J.Q. Wu. 2014. An RNA-sequencing transcriptome and splicing

database of glia, neurons, and vascular cells of the cerebral cortex. *J Neurosci*. 34:11929-11947.

Zylka, M.J., J.M. Simon, and B.D. Philpot. 2015. Gene length matters in neurons. *Neuron*. 86:353-355.

## Figure Legends

**Figure 1. Novel isoforms of SINE-containing *Pgc1α* are expressed in the mouse brain.** (A) schematic representation of gene structures of the reference, SSR-SINE-exon2 and SSR-exon2 isoforms of *Pgc1α*. Brackets depict distance between the exons, black line on top indicates splicing, grey arrow over exon 1 indicates canonical start codon. (B) UCSC browser track depicting the genomic location of SSR, SINE and exons of the reference *Pgc1α* gene (in black); gene goes from left to right. Common exons reflect those present in all isoforms, excluding exon 1 that is only present in the reference gene. In blue are PacBio peaks from reads aligning to each respective exon of the gene. Pie chart on the right depicts the proportion of full-length reads that covered the entire length of each isoform; data obtained using reads >2 Kb. (C) ChIP-seq peaks of RNA polymerase II (pol2) over the coordinates of the SSR or exon 1 of *Pgc1α* in different tissues. The genomic coordinates of the reference isoform are shown in blue on the bottom left corner. (D) Same as C but using ChIP-seq data for the promoter H3K9ac mark (in blue) or the repressive H3K27me3 mark (red) in the hippocampus. (E) Number of RNA-seq counts covering the junctions of SSR-exon2, SINE-exon2 or exon1-exon2 were used to establish the degree of expression of each of the three major isoforms of *Pgc1α* in brain-specific cell types. Data are depicted as counts per FPKM (fragments per Kb per million).

**Figure 2. Proteins are expressed from the novel brain-specific *Pgc1α* transcripts.** (A) Schematic representation of the putative protein structures of the two novel brain isoforms of *Pgc1α*; the protein derived from the reference gene is also depicted. Numbers above reflect amino acid positions; known domains are shown below. SR= serine-arginine rich. (B). Ribo-seq data from hippocampus (red) and liver (blue) were used to define the presence of the SSR, SINE and exons of reference *Pgc1α* within actively translating ribosomes. Genomic structure of the reference and SSR-SINE-exon2 isoforms are shown in black below.

**Figure 3. Mutations on the SINE lead to sexual dimorphic behavioural deficits in the absence of gross brain lesions.** (A) Genotype frequencies by sex among alive offspring born from breeding of SINE heterozygous mutant mice, based on Pearson's chi-square test of homogeneity (N=456 total offspring, \* denotes p=0.028); WT – wild-type homozygous, Het – heterozygous KO, KO homozygous. (B) Weight changes were followed in mutant and wild-type

littermates over time; final weight measure (approximately 60 weeks in age) [genotype x age interaction,  $F(6,156)=10.97$ ,  $p<0.0001$ ]. (C) Gross sections of brains from control or mutant littermates. (D) Rotarod test in which mice underwent 2 trials each at rotating speeds of 0–10 accelerating and 16, 20, 24, 28, and 32 fixed rpm. Each trial was a maximum of 60 sec, with at least 5 min between each trial. Data are means (+ SEM) of 2 trials per rpm. Trials 0-10 had accelerating speed; remaining trials had fixed speeds. (E) Magnitude of startle responses and (F) pre-pulse inhibition in *Pgc1 $\alpha$*  SINE isoform-specific KO mice. Trials included no stimulus (NoS) and acoustic startle stimulus (AS, 120 dB) alone; \* $p<0.05$ . (G) Results from elevated plus maze; \* $p<0.05$  and (H) Morris water maze as it relates to time to escape visible platform and swim speed. (I) Quadrant preference in the water was gauged after mice were given a 1-min probe trial without the platform on the final day of the hidden platform training. Measures were taken of swim path crosses over the location of the platform (in Quadrant 1), and the corresponding locations in Quadrants 2, 3, and 4. \* $p<0.05$ . (J) Motor coordination on an accelerating rotarod test as gauged in wild-type and mutant littermates. Data are means (+ SEM) for each group. Maximum trial length was 300 sec. Trials 4 and 5 were given 48 hours after the first 3 trials, when mice were 16-19 weeks in age. Mice were 31-36 weeks in age for trials 6 and 7 and were re-tested at 50-61 weeks. \* $p<0.05$ . (K) Animals were subjected to the same protocol as in (E). (L) At 56-66 weeks, animals performed a rapid reversal rotarod. Data are means (+ SEM) for each group, with males and females pooled ( $F(1,41) = 7.959$ ,  $p = 0.007$ ).

**Figure 4. Loss of the SINE isoform leads to sexual dimorphic gene expression profiles.**

(A) Principal component analysis of 12,527 multivariate significant probe sets (RMA-normalized probe intensities,  $\log_2FC$  ANOVA FDR  $p<0.05$ ,  $|\log_2FC|>0.286$  for  $SNR>1$  vs. grand mean;  $PC1_{organ} + PC2_{sex} = 82\%$  total variance) was used to determine the main components driving the differences between gene expression profiles of wild-type and mutant littermates. (B) Volcano plots depicting 9,996 statistically differential probe sets between any genotype  $\times$  organ  $\times$  sex groups overall (multivariate significant,  $\log_2FC$  *post hoc* pairwise  $p<0.05$ ; 5% practical difference  $|\log_2FC|>0.094$ ); black highlights 2,363 differential probe sets combined that meet differential criteria in same-organ, same-sex comparisons between WT vs. SINE KO mutant mice, the number of which is indicated inside each panel. (C) Gene expression data was segregated into patterns using unsupervised hierarchical clustering based on 1,980 single-gene probe sets encompassing 1,615 gene annotations, corresponding to the subset from same-sex 2,363



differentially expressed probes curated against RIKEN cDNA clones, multi-gene, or no-gene annotations. The heatmap on the right (Cb = cerebellum, Br = rest of brain, i.e. whole brain minus cerebellum) depicts the patterns giving rise to the distinct clusters: red cluster I (330 single-gene probe sets, 257 genes,  $\log_2FC$  min: +0.12, max: +3.48, IQR: [+0.84, +1.31]), green cluster II (807 single-gene probe sets, 677 genes,  $\log_2FC$  min: -0.32, max: +0.92, IQR: [+0.34, +0.55]), blue cluster III (172 single-gene probe sets, 156 genes,  $\log_2FC$  min: -1.53, max: -0.10, IQR: [-0.63, -0.38]), and orange cluster IV (671 single-gene probe sets, 591 genes,  $\log_2FC$  min: -2.79, max: +0.27, IQR: [-0.57, -0.37]); cluster-wise expression differences were deemed statistically robust based on  $|\log_2FC| > 0.286$  (SNR > 1 threshold). (D) Ingenuity Pathway Analysis (IPA) of based on the curated list of 1,980 single-gene differential probe sets with statistically robust expression differences per group ( $|\log_2FC| > 0.286$ ; male cerebellum: 457 probe sets; female cerebellum: 1,738); dots indicate pathways without significant enrichment within gene sets per group. (E) Upstream regulators predicted based on the genes differentially expressed in females (left) or males (right). All differentially expressed genes, only the ones with a PGC1 $\alpha$  recognition sequence within  $\pm$  1Kb of the annotate promoter or the ones without it were separately considered. Only data from cerebellum was analysed. Z-scores range depicting activation (orange) or inhibition (blue) are shown.

## Supplementary Tables

[https://orio.niehs.nih.gov/ucscview/Santos/Pgc1a/Table\\_S1\\_PacBio-Pgc1a.xlsx](https://orio.niehs.nih.gov/ucscview/Santos/Pgc1a/Table_S1_PacBio-Pgc1a.xlsx)

[https://orio.niehs.nih.gov/ucscview/Santos/Pgc1a/Table\\_S2\\_-\\_differentially\\_expressed\\_genes.xlsx](https://orio.niehs.nih.gov/ucscview/Santos/Pgc1a/Table_S2_-_differentially_expressed_genes.xlsx)

[https://orio.niehs.nih.gov/ucscview/Santos/Pgc1a/Table\\_S3\\_-\\_KEGG\\_analysis.xlsx](https://orio.niehs.nih.gov/ucscview/Santos/Pgc1a/Table_S3_-_KEGG_analysis.xlsx)

[https://orio.niehs.nih.gov/ucscview/Santos/Pgc1a/Table\\_S4\\_-\\_KEGG\\_candidate\\_NRs.xlsx](https://orio.niehs.nih.gov/ucscview/Santos/Pgc1a/Table_S4_-_KEGG_candidate_NRs.xlsx)

[https://orio.niehs.nih.gov/ucscview/Santos/Pgc1a/Table\\_S5\\_-\\_striatum\\_data.xlsx](https://orio.niehs.nih.gov/ucscview/Santos/Pgc1a/Table_S5_-_striatum_data.xlsx)





Fig. 1

A

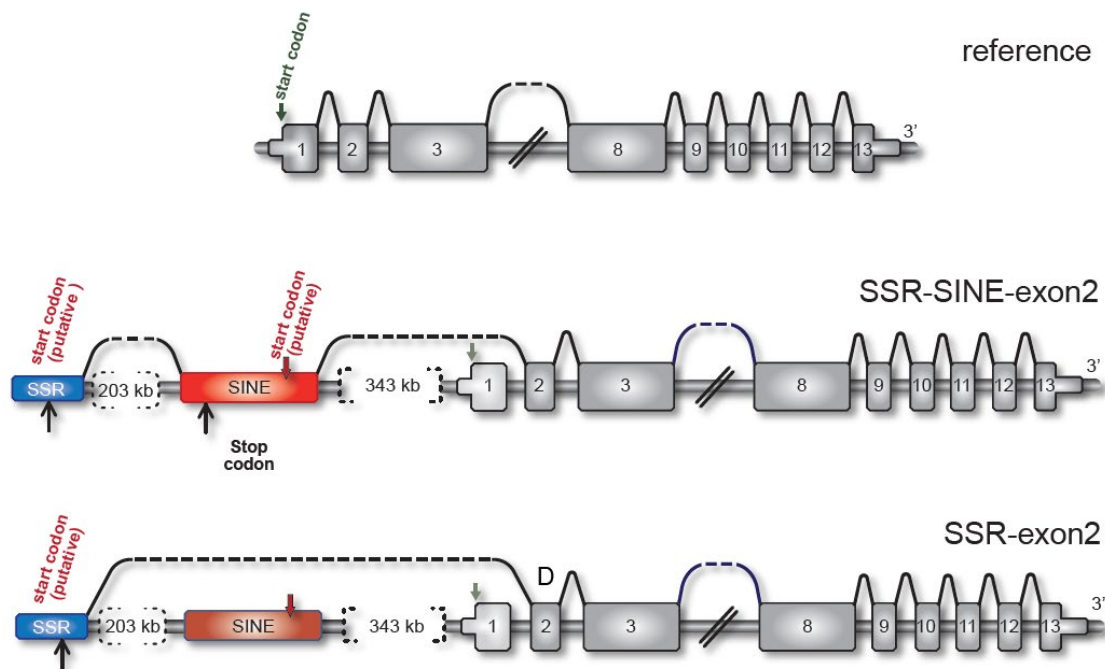

B

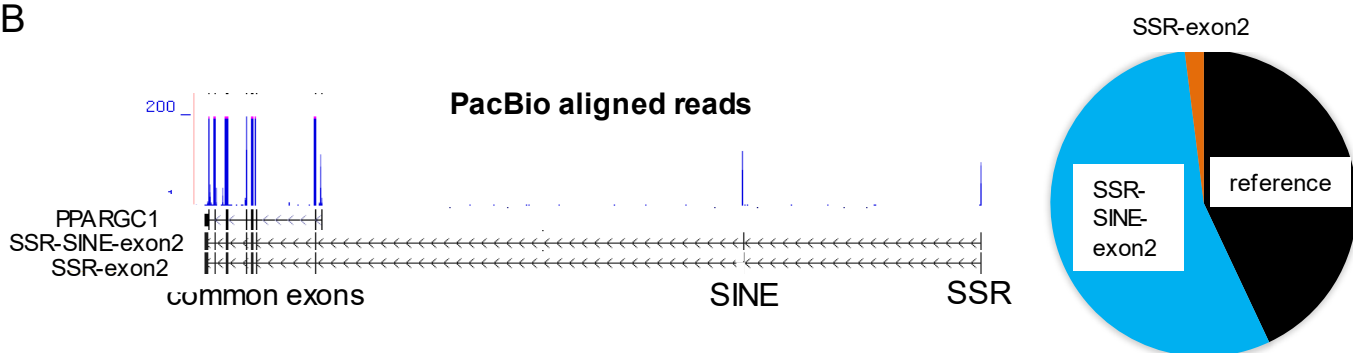

C

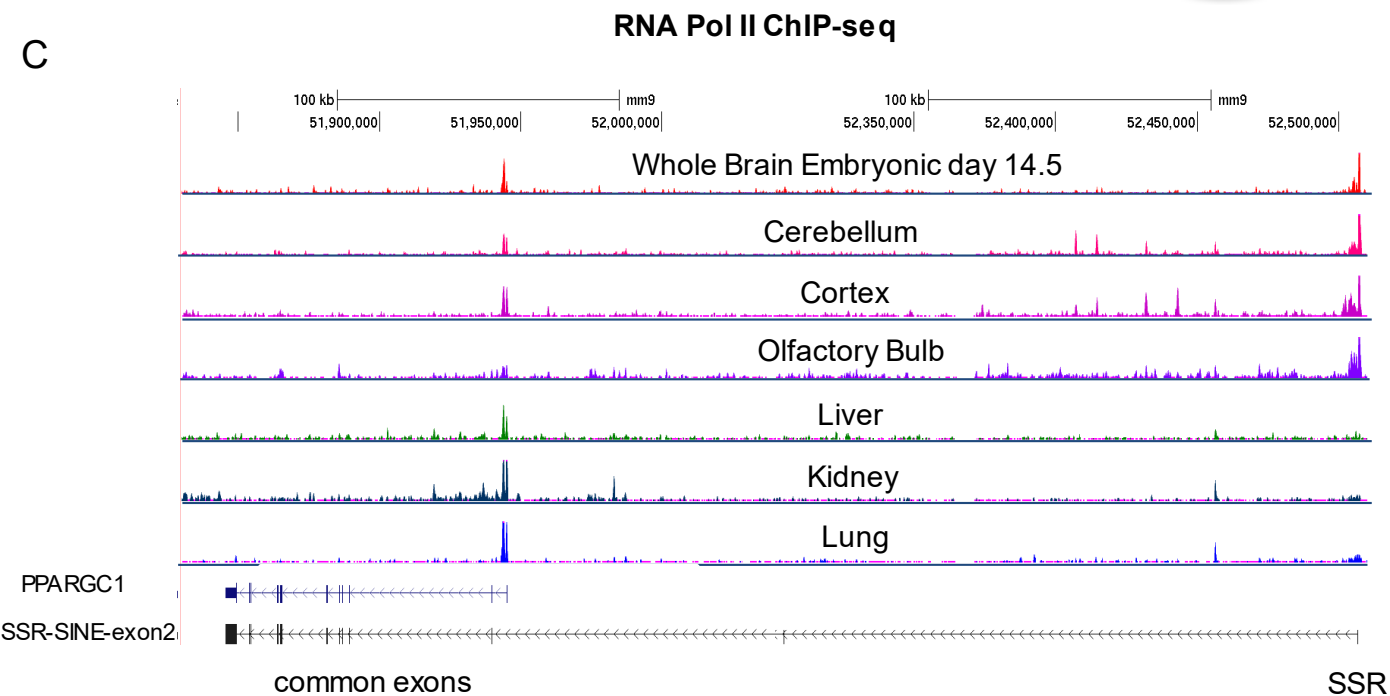

D

### ChIP-seq hippocampus

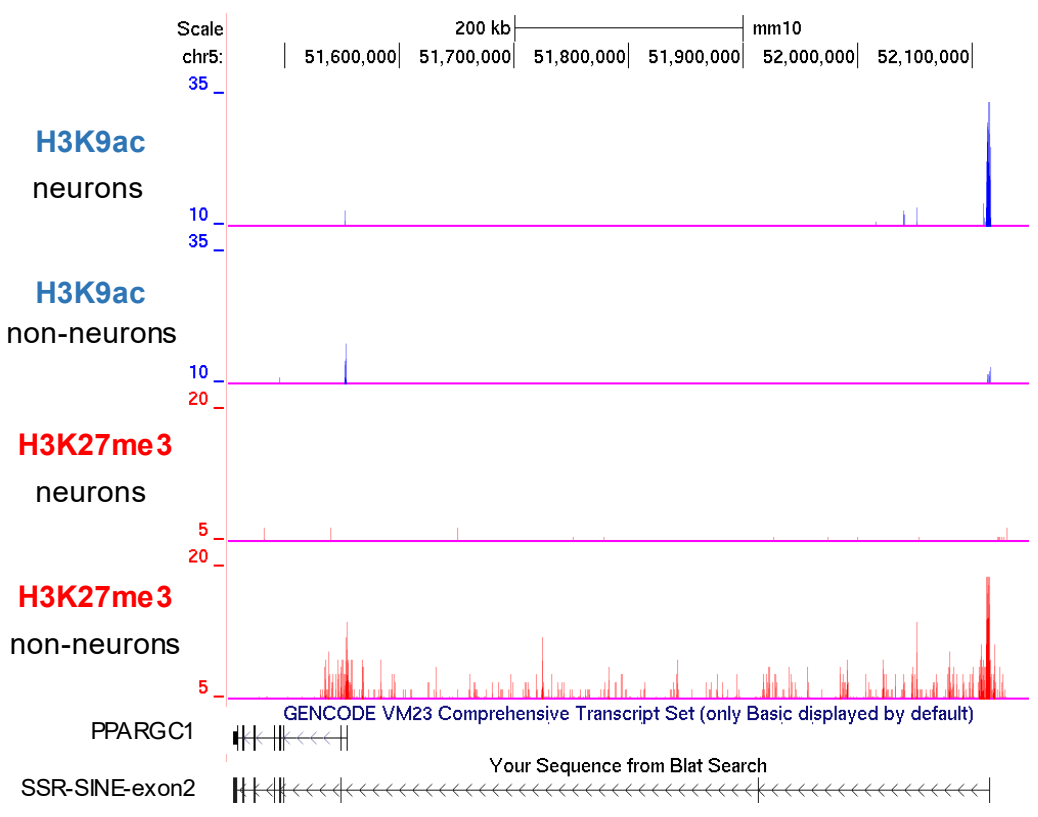

E

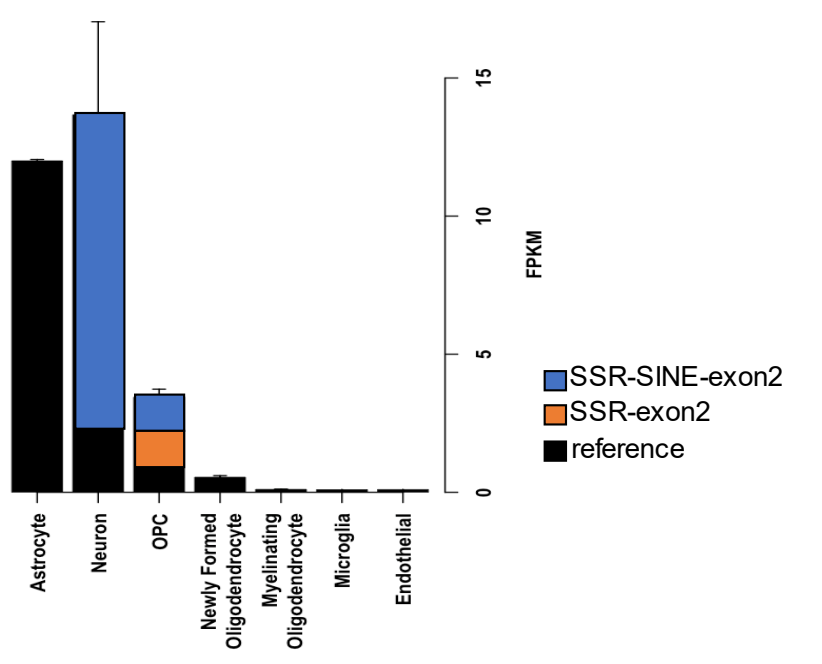

Fig. 2

A

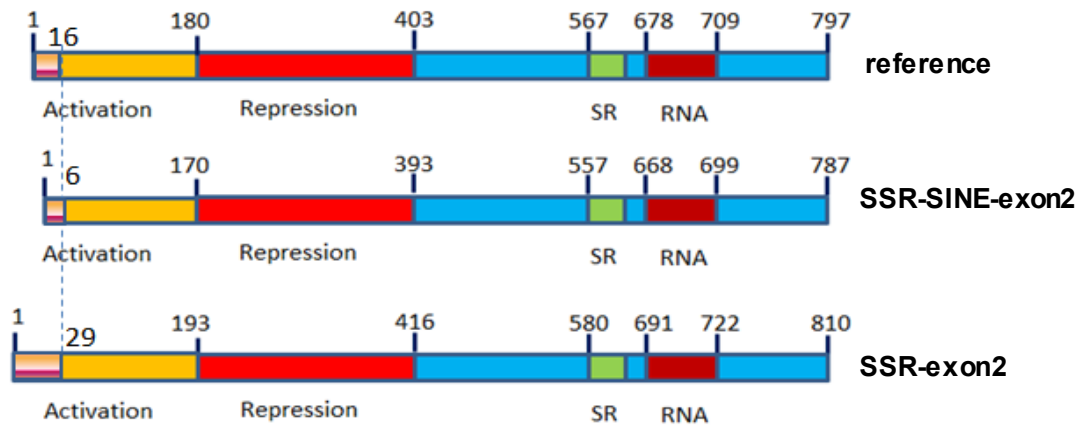

B

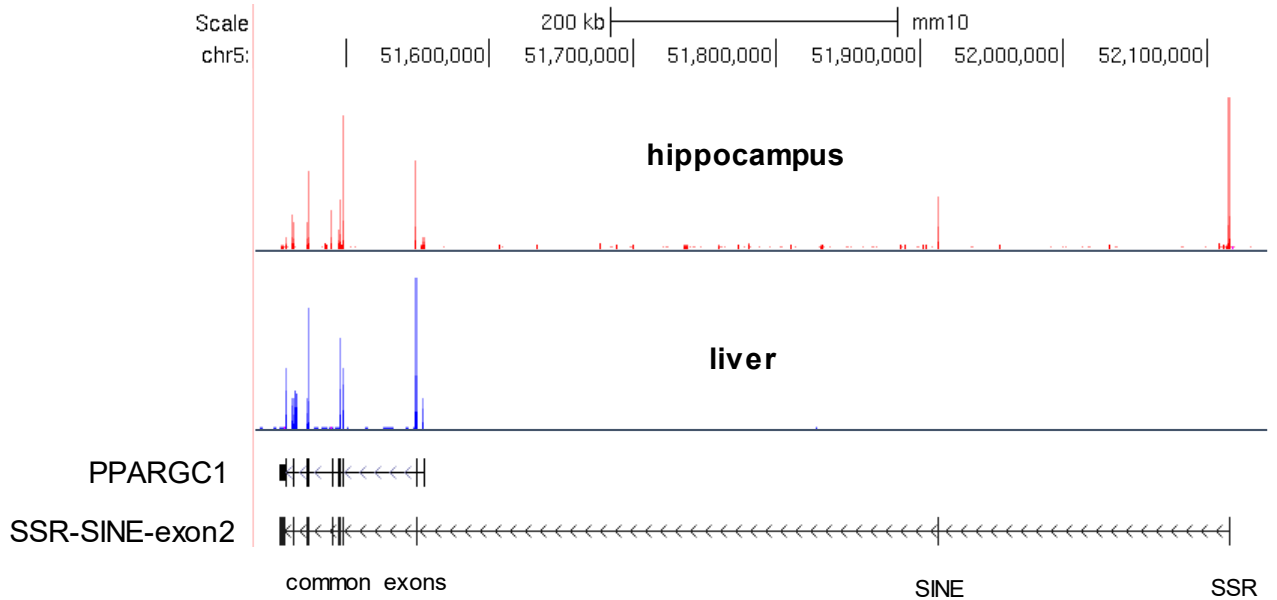

Fig. 3

A

| Freq Share Comparisons |   |   | Genotype    |              |             |                 |
|------------------------|---|---|-------------|--------------|-------------|-----------------|
|                        |   |   | WT          | Het          | KO          | Total Responses |
| Sex                    | M | A | 70<br>31.5% | 89<br>40.1%  | 63<br>28.4% | 222             |
|                        | F | B | 60<br>25.6% | 123<br>52.6% | 51<br>21.8% |                 |

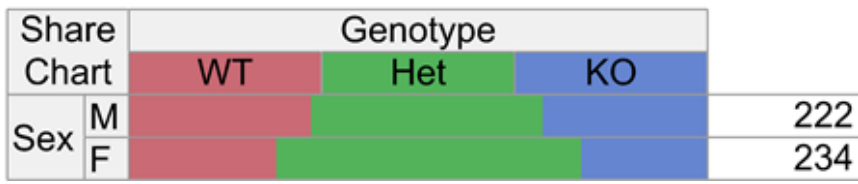

B

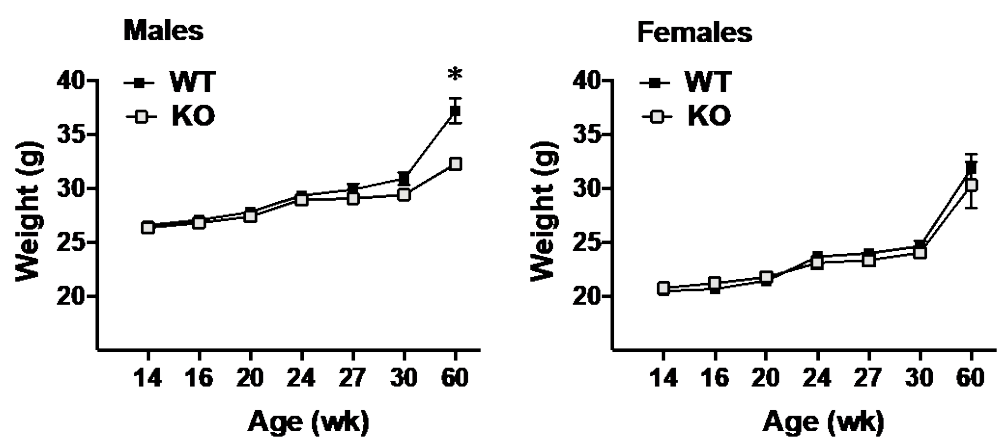

Fig. 3

C

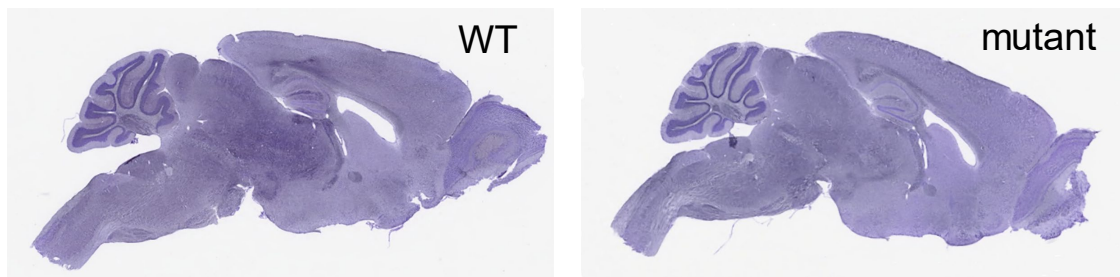

D

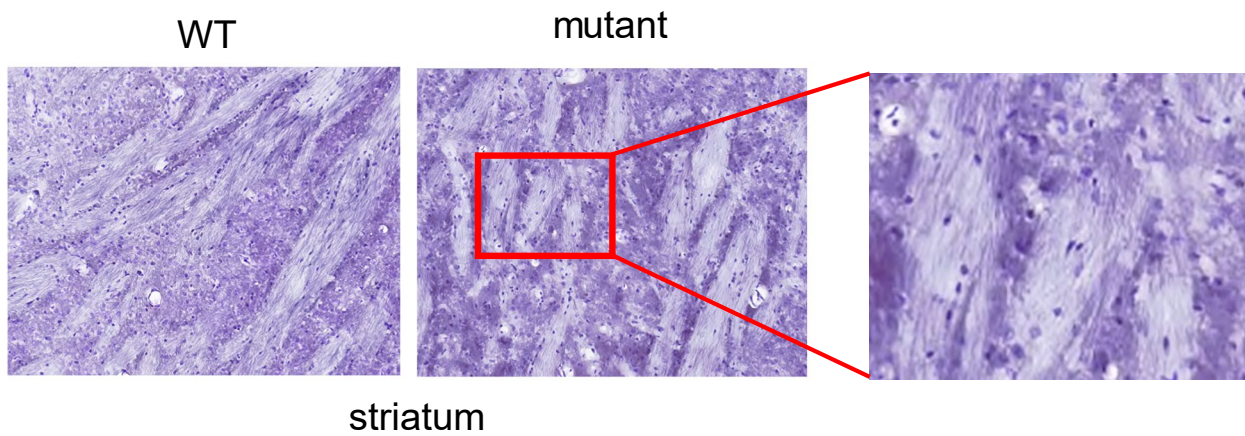

E

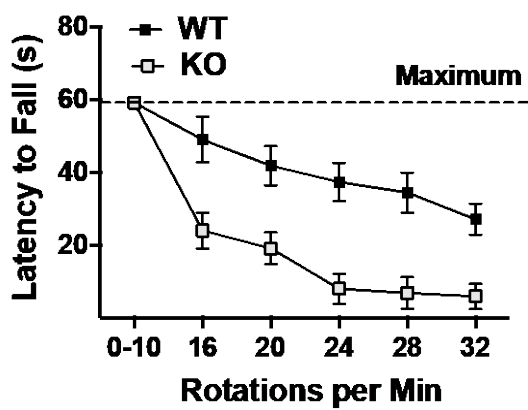

F

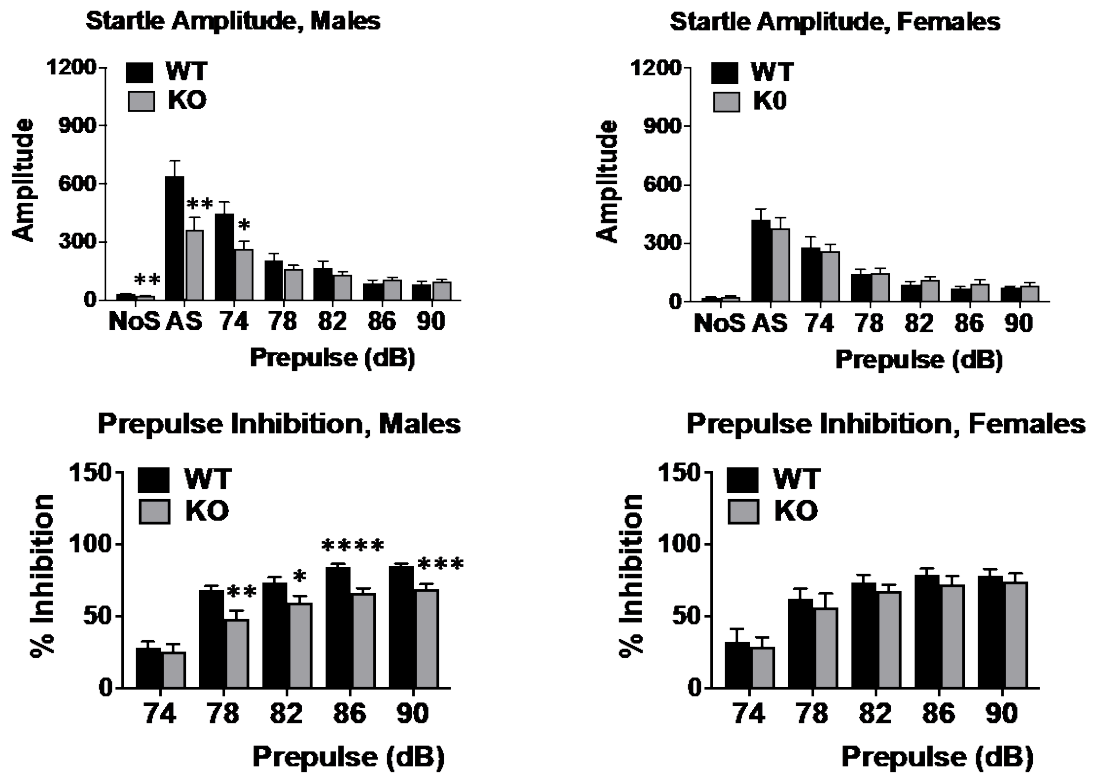

G

|                          | Males  |         | Females |        |
|--------------------------|--------|---------|---------|--------|
|                          | WT     | KO      | WT      | KO     |
| Elevated plus maze       |        |         |         |        |
| Percent open arm time    | 29 ± 3 | 35 ± 5  | 38 ± 3  | 37 ± 8 |
| Percent open arm entries | 38 ± 3 | 39 ± 3  | 40 ± 2  | 45 ± 3 |
| Total number of entries  | 24 ± 1 | 17 ± 2* | 23 ± 2  | 20 ± 2 |

H

|                                      | Males    |           | Females  |          |
|--------------------------------------|----------|-----------|----------|----------|
|                                      | WT       | KO        | WT       | KO       |
| Visible platform, escape latency (s) |          |           |          |          |
| Day 1                                | 25 ± 2   | 30 ± 2    | 30 ± 4   | 38 ± 7   |
| Day 2                                | 14 ± 2   | 13 ± 2    | 19 ± 3   | 25 ± 6   |
| Swim speed (cm/s)                    |          |           |          |          |
| Day 1 of visible platform test       | 17 ± 0.7 | 15 ± 0.6  | 17 ± 0.7 | 15 ± 1.0 |
| Day 1 of acquisition                 | 19 ± 0.4 | 16 ± 1.0* | 18 ± 0.7 | 16 ± 0.7 |

\*p&lt;0.05.

Fig. 3

I

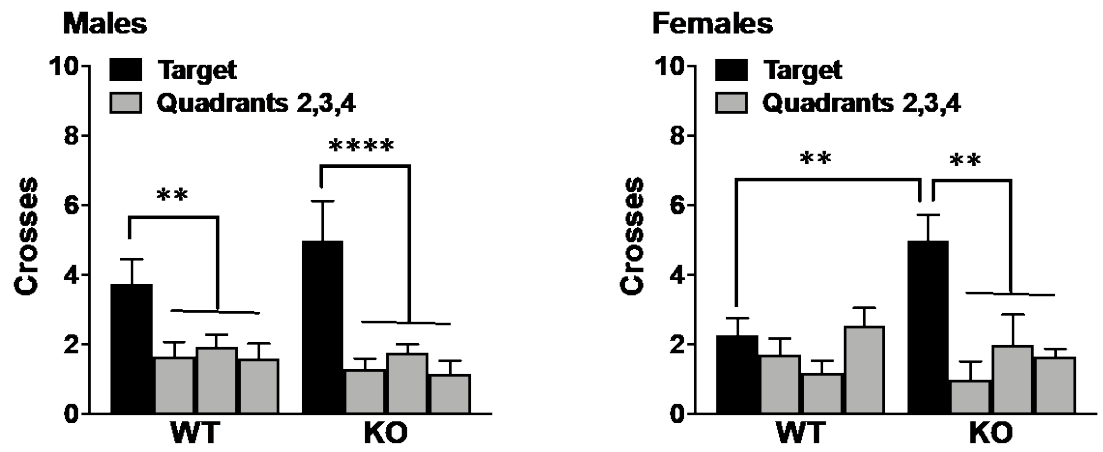

J

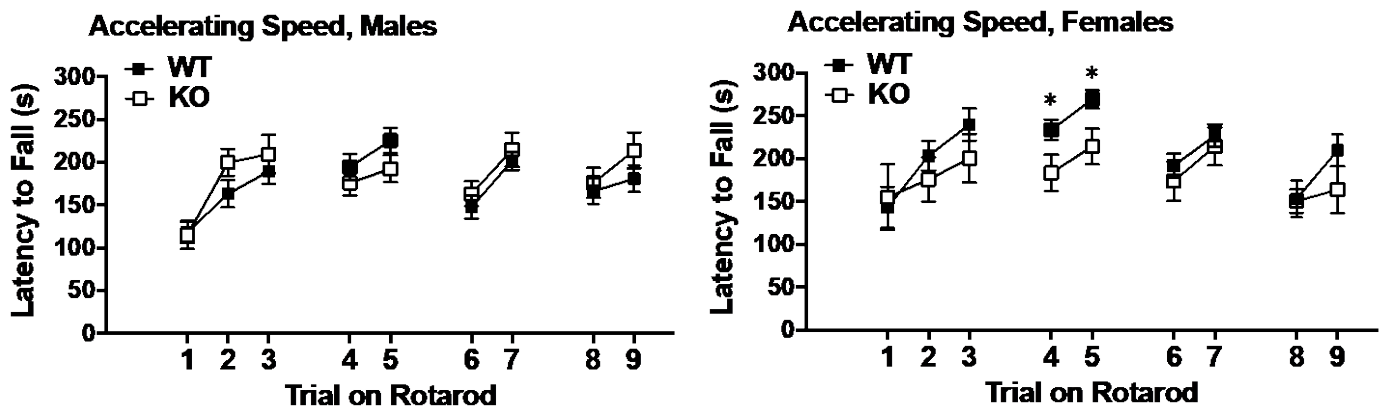

K

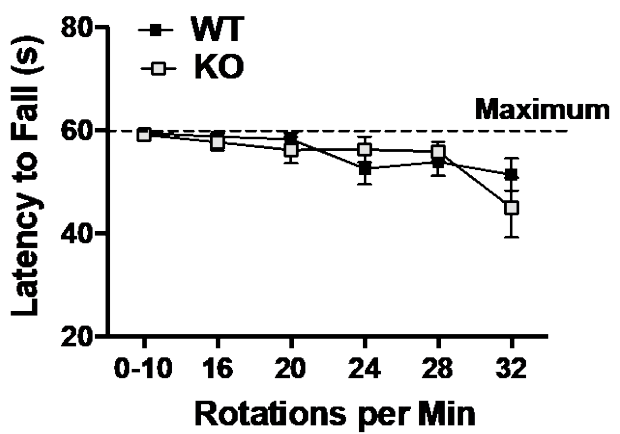

L

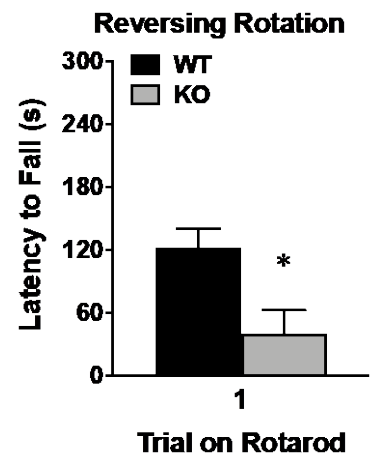



Fig. 4

A

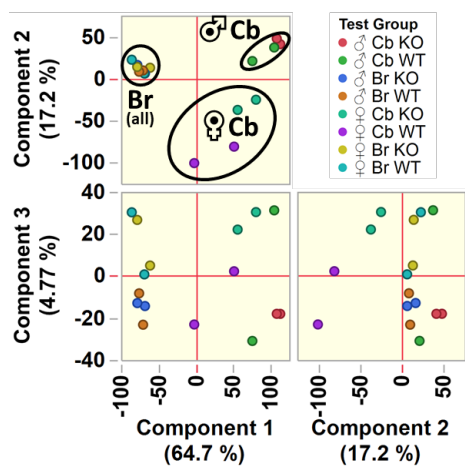

B

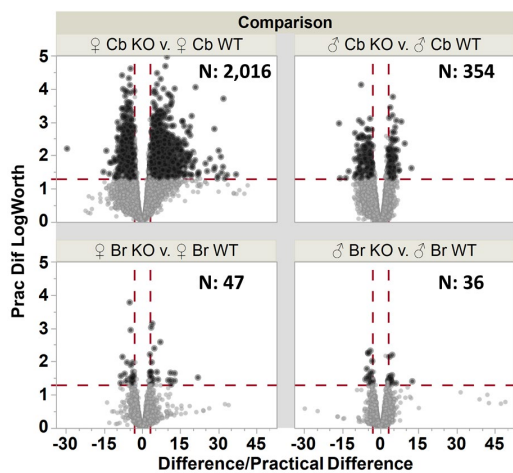

C

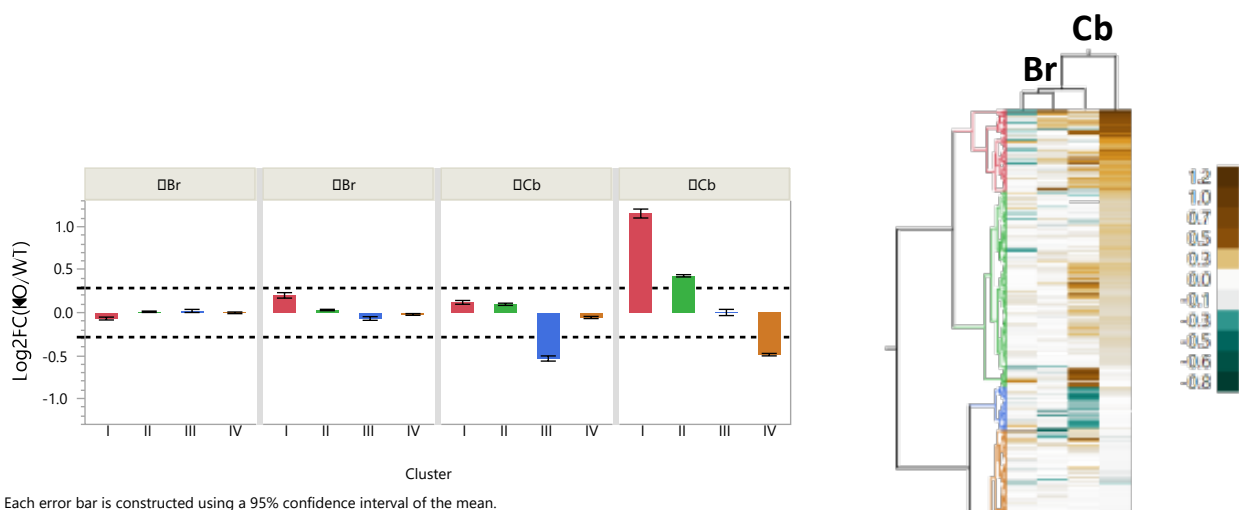

D

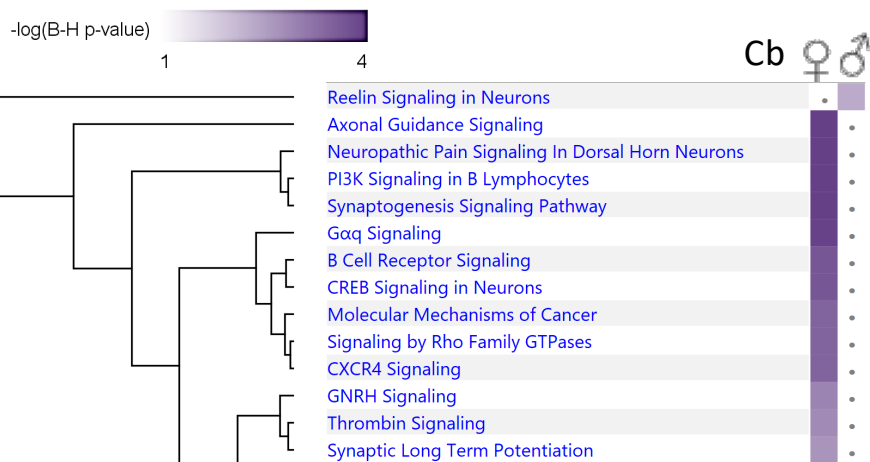

Fig. 4

E

Activation z-score

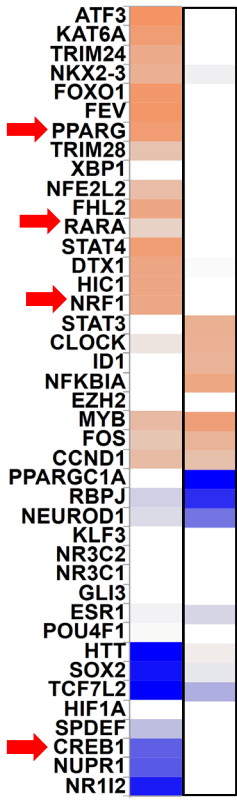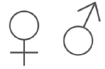

Source: https://www.biorxiv.org/content/10.1101/2020.09.18.300418v1.full.pdf
